# Supplementary material
Source: PubMed Central journal article supplement (PMC2948484)

# Supporting Information

## Short Total Syntheses of Arylindolizidine Alkaloids (+)-Ipalbidine and (+)-Antofine

Micah J. Niphakis and Gunda I. Georg

[georg@umn.edu](mailto:georg@umn.edu)

### TABLE OF CONTENTS

|                                                                                                                         |       |
|-------------------------------------------------------------------------------------------------------------------------|-------|
| General experimental paragraph.....                                                                                     | S2    |
| Experimental and characterization data.....                                                                             | S2    |
| ( <i>S</i> )- <i>tert</i> -Butyl 2-(2-(Methoxy(methyl)amino)-2-oxoethyl)pyrrolidine-1-carboxylate ( <b>2</b> ).....     | S2    |
| ( <i>S</i> )- <i>tert</i> -Butyl 2-(2-Oxobut-3-yn-1-yl)pyrrolidine-1-carboxylate ( <b>3</b> ).....                      | S3    |
| ( <i>S</i> )-2,3,8,8a-Tetrahydroindolizin-7(1 <i>H</i> )-one ( <b>5</b> ).....                                          | S4    |
| ( <i>S</i> )-6-(4-Methoxyphenyl)-2,3,8,8a-tetrahydroindolizin-7(1 <i>H</i> )-one ( <b>7</b> ).....                      | S5    |
| (6 <i>S</i> ,8 <i>aS</i> )-6-(4-Methoxyphenyl)hexahydroindolizin-7(1 <i>H</i> )-one.....                                | S6    |
| (6 <i>S</i> ,7 <i>S</i> ,8 <i>aS</i> )-6-(4-Methoxyphenyl)-7-methyloctahydroindolizin-7-ol ( <b>8</b> ).....            | S6    |
| Optimization of dehydration conditions.....                                                                             | S7    |
| ( <i>S</i> )-6-(4-Methoxyphenyl)-7-methyl-1,2,3,5,8,8a-hexahydroindolizine ( <b>9</b> ).....                            | S8, 9 |
| ( <i>S</i> )-6-(4-Methoxyphenyl)-1, 2, 3, 5, 8, 8a-hexahydroindolizin-7-yl-trifluoromethanesulfonate ( <b>10</b> )..... | S8    |
| (+)-Secoantofine.....                                                                                                   | S10   |
| (+)-Ipalbidine.....                                                                                                     | S11   |
| (+)-Antofine.....                                                                                                       | S12   |
| References.....                                                                                                         | S13   |
| HPLC Data.....                                                                                                          | S14   |
| Spectra.....                                                                                                            | S15   |

## GENERAL EXPERIMENTAL PARAGRAPH

Unless otherwise specified, all starting materials, reagents and solvents are commercially available and were used without further purification. Flash column chromatography was carried out on silica gel. TLC was conducted on silica gel 250 micron, F<sub>254</sub> plates. <sup>1</sup>H NMR spectra were recorded on either a 400 or 500 MHz NMR instrument. Chemical shifts are reported in ppm with TMS or CHCl<sub>3</sub> as an internal standard (TMS: 0.00 ppm, CHCl<sub>3</sub>: 7.26 ppm). Data are reported as follows: chemical shift, multiplicity (s = singlet, d = doublet, t = triplet, q = quartet, b = broad, m = multiplet), integration and coupling constants (Hz). <sup>13</sup>C NMR spectra were recorded on either a 100 or 125 MHz NMR spectrometer with complete proton decoupling. Chemical shifts are reported in ppm with the solvent as internal standard (CHCl<sub>3</sub>: 77.2 ppm). IR of solids were obtained by dissolving the sample in CHCl<sub>3</sub> and letting the solvent evaporate on a KBr plate.

## EXPERIMENTAL AND CHARACTERIZATION DATA

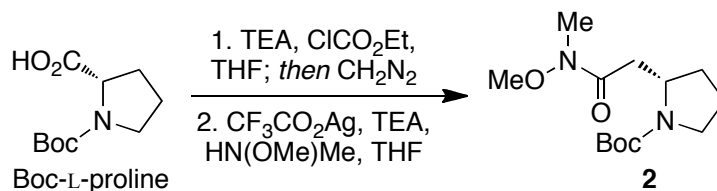

**(S)-tert-Butyl 2-(2-(Methoxy(methyl)amino)-2-oxoethyl)pyrrolidine-1-carboxylate (2).** *Warning: Large amounts of diazomethane were used for this transformation. Proper care should be taken when handling this highly explosive reagent. All glassware used was free of cracks, scratches or ground-glass joints and a blast shield was used.* Boc-L-proline (10.8 g, 50.0 mmol, 1.00 equiv) was taken into THF (100 mL) with stirring and cooled to 0 °C with an ice bath. The reaction solution was treated with TEA (7.66 mL, 55.0 mmol, 1.10 equiv) and allowed to react for 15 min to fully deprotonate the carboxylic acid. With the addition of ethyl chloroformate (5.23 mL, 55.0 mmol, 1.10 equiv), a thick white precipitate formed. Stirring was continued for 15 min then stopped. In a separate flask, an ice-cold ethereal solution of diazomethane was prepared and, without stirring, was carefully decanted into the freshly prepared anhydride reaction flask

using a glass funnel. The reaction solution was lightly stirred for 4 seconds then stirring was stopped. The mixture was allowed to warm to room temperature and react overnight. Any additional diazomethane was carefully quenched with 0.5 N acetic acid (100 mL). The drop-wise addition of saturated sodium bicarbonate regulated the solution back to a basic pH 8-9 with gentle stirring. The organic and aqueous layers were separated. The organic phase was washed twice each with saturated sodium bicarbonate and brine then dried over sodium sulfate. The solvent was evaporated under reduced pressure. The diazoketone was purified by chromatography on silica gel (15% EtOAc/hexanes) to provide the title compound (**1**) as a yellow oil (72%). The spectral data matched that in the literature.<sup>1</sup>

Diazoketone **1** (7.37 g, 30.8 mmol, 1.00 equiv) was taken into THF (130 mL) and cooled to 0 °C. Foil was used to cover the reaction flask so as to exclude light from the reaction solution. To this was added freshly distilled *N,O*-dimethylhydroxylamine (4.00 g, 92.4 mmol, 3.00 equiv).<sup>2</sup> In a separate foil covered flask, silver(I) trifluoroacetate (1.37 g, 6.20 mmol, 0.20 equiv) was dissolved in TEA (86 mL). This solution was added to the diazoketone mixture over 30 min. The reaction temperature was allowed to slowly warm to room temperature and the solution was stirred overnight. To the reaction mixture was added activated charcoal (~2 g) and the reaction mixture was stirred for 5 min and filtered. The filtrate was concentrated and the residue redissolved in EtOAc. To this was added activated charcoal (~2 g) and the process repeated. When the filtrate had been concentrated a second time the residue was purified via SiO<sub>2</sub> flash chromatography (50% EtOAc/hexanes) affording the pure Weinreb amide as a clear oil (97%). Spectral data of the title compound was identical to that reported in the literature.<sup>3</sup>

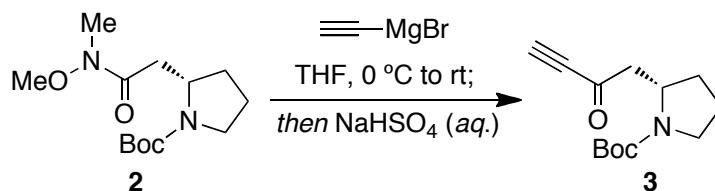

**(S)-tert-Butyl 2-(2-Oxobut-3-yn-1-yl)pyrrolidine-1-carboxylate (3)**. Weinreb amide **2** (4.7 g, 17 mmol, 1.0 equiv) was dissolved in anhydrous THF (200 mL) under nitrogen atmosphere and cooled to 0 °C. To this reaction vessel, was added dropwise, a solution of ethynyl magnesium bromide reagent (170 mL, 86 mmol, 5.0 equiv, 0.5 M in THF) and

allowed to come to room temperature. After the reaction was judged complete by TLC it was quenched by the addition of an ice cold 10% HCl solution (15 mL) and allowed to stir at this temperature for 5 min. The reaction was diluted with water and extracted with EtOAc (x3). The combined organic layers were washed with saturated NaHCO<sub>3</sub> (x1), dried over Na<sub>2</sub>SO<sub>4</sub>, filtered and concentrated. The title compound was obtained as a clear oil (3.9 g, 97% yield) after SiO<sub>2</sub> flash chromatography (20% EtOAc/hexanes): Spectral data was identical to that reported in the literature.<sup>4</sup>

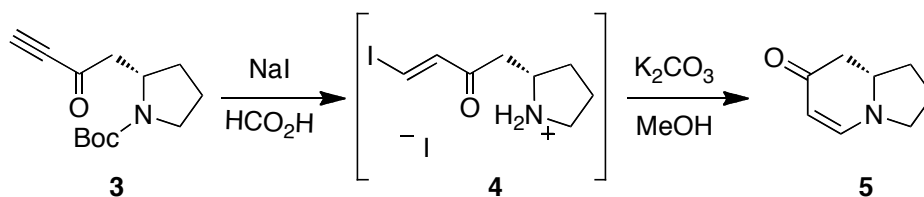

**(S)-2,3,8,8a-Tetrahydroindolizin-7(1H)-one (5).** Ynone **3** (3.74 g, 15.8 mmol, 1.0 equiv) was dissolved in formic acid (50 mL) solution under a N<sub>2</sub> atmosphere and NaI (7.09 g, 47.3 mmol, 3.0 equiv) was added. The reaction was left stirring for 6 h at room temperature. The solvent was removed by passing N<sub>2</sub> over the reaction mixture. The remaining residue was placed under vacuum for 15 minutes and then dissolved in MeOH (100 mL). A separate flask was charged with 700 mL of MeOH and K<sub>2</sub>CO<sub>3</sub> (10.9 g, 79.0 mmol, 5.0 equiv). To this flask was added the solution of deprotected ynone over 15 minutes. The reaction was stirred for 1 h and the solvent was evaporated. At this time CH<sub>2</sub>Cl<sub>2</sub> was added to redissolve the product (but not the inorganic salts), the slurry was suction filtered, and the filtrate concentrated. To the solid residue was added more CH<sub>2</sub>Cl<sub>2</sub> and the precipitates were once again filtered away. This residue after removal of solvent was purified via SiO<sub>2</sub> flash chromatography to provide the title compound as an off-white solid (2.05 g, 95% yield) after SiO<sub>2</sub> flash chromatography (100% acetone). Spectral data of the title compound was identical to that reported in the literature.<sup>4a</sup> Optical rotation.  $[\alpha]_D^{22} = -727$  (*c* 1.00, CHCl<sub>3</sub>).<sup>4b</sup>

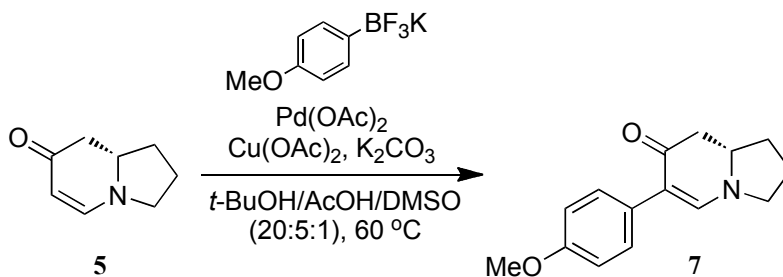

**(S)-6-(4-Methoxyphenyl)-2,3,8,8a-tetrahydroindolizin-7(1H)-one (7).** Freshly purified enaminone (750 mg, 5.5 mmol, 1.0 equiv), Pd(OAc)<sub>2</sub> (370 mg, 1.7 mmol, 0.30 equiv), anhydrous Cu(OAc)<sub>2</sub> powder (3.0 g, 17 mmol, 3.0 equiv) and granular K<sub>2</sub>CO<sub>3</sub> (1.5 g, 11 mmol, 2.0 equiv) were combined in a 20:5:1 mixture of degassed *t*-BuOH/AcOH/DMSO (55 mL) under N<sub>2</sub> and stirred for 5 min (*Note: Solvents were used without purification*). The reaction mixture was heated to 60 °C and the potassium trifluoroborate (3.5 g, 17 mmol, 3.0 equiv) was added slowly over 5 h as a solid. Approximately, 0.20 equivalents of trifluoroborate were added every 30 min. The reaction was stirred for an additional hour and was monitored by TLC using 100% EtOAc as the mobile phase. The reaction mixture was diluted with EtOAc and added to a separatory funnel containing brine. The product was extracted with EtOAc (3x). The combined organic layers were washed brine (2x) and sat. NaHCO<sub>3</sub> (*aq.*) (2x), dried over Na<sub>2</sub>SO<sub>4</sub> and concentrated *in vacuo*. The title compound was obtained as a pale yellow solid (930 mg, 70% yield) after SiO<sub>2</sub> flash chromatography (80% EtOAc/hexanes). Spectral data of the title compound was identical to that reported in the literature<sup>5</sup> with the exception of optical rotation.  $[\alpha]_D^{22} = -97.5$  (*c* 1.00, CHCl<sub>3</sub>). Enantiomeric ratio was determined to be 98.5:1.5 via chiral HPLC using a Chiralcel OJ column. Conditions: *i*-PrOH 70% in hexanes, 30 min, 1.0 mL/min, 30 °C. (-)-Enantiomer: R<sub>t</sub> = 20.9 min; (+)-Enantiomer: R<sub>t</sub> = 11.1 min.

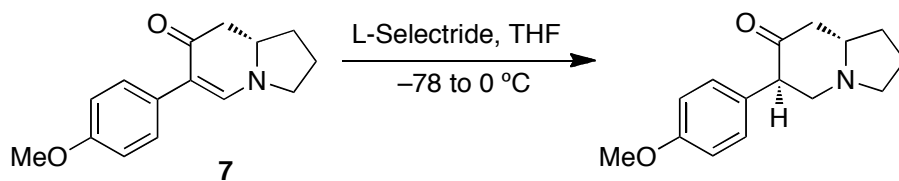

**(6*S*,8*aS*)-6-(4-Methoxyphenyl)hexahydroindolizin-7(1*H*)-one.** Enaminone **7** (120 mg, 0.50 mmol, 1.0 equiv.) was dissolved in anhydrous THF (5 mL) under a N<sub>2</sub> atmosphere. The solution was cooled to -78 °C at which point L-Selectride (0.55 mL, 0.55 mmol, 1.1 equiv, 1.0 M in THF) was added over 15 minutes. After stirring for 1 h, the reaction was slowly warmed to 0 °C over 1.5 h and stirred at room temperature for an additional 2 h. The reaction was quenched with a saturated solution of NaHCO<sub>3</sub> (*aq.*) and added to a separatory funnel. The product was extracted with EtOAc (3x). The combined organic layers were dried over Na<sub>2</sub>SO<sub>4</sub> and concentrated *in vacuo*. The title compound (110 mg, 90% yield) was obtained as a white crystalline solid (mp 118–120 °C) after SiO<sub>2</sub> flash chromatography [60% EtOAc/hexanes (1% TEA)]. Spectral data was identical to that reported.<sup>6</sup>  $[\alpha]_D^{22} = +6.05$  (*c* 1.14, CHCl<sub>3</sub>).

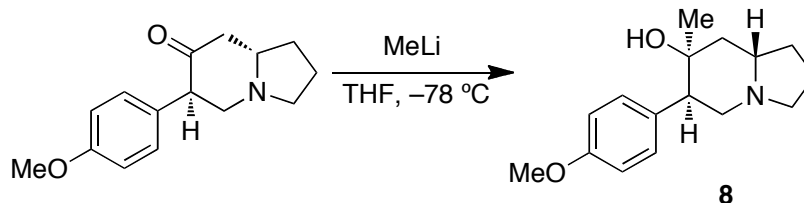

**(6*S*,7*S*,8*aS*)-6-(4-Methoxyphenyl)-7-methyloctahydroindolizin-7-ol (**8**).** The indolizidinone (105 mg, 0.43 mmol, 1.00 equiv) was taken in anhydrous THF (3.5 mL) in a flame dried RBF and cooled to -78 °C. Methyl lithium (0.32 mL, 0.52 mmol, 1.2 equiv, 1.6 M in Et<sub>2</sub>O) was added dropwise and stirred for 45 min at -78 °C. The reaction was quenched with MeOH (1 mL) and allowed to warm to room temperature. The quenched reaction mixture was added to a separatory funnel containing 10% NaOH (*aq.*) and the product was extracted with EtOAc (3x). The combined organic layers were dried over Na<sub>2</sub>SO<sub>4</sub> and concentrated *in vacuo*. The title compound (85 mg, 75% yield) was obtained as a white crystalline solid (mp 92–96 °C) after SiO<sub>2</sub> flash chromatography [50% EtOAc/hexanes (1% TEA)]. <sup>1</sup>H NMR (500 MHz, CDCl<sub>3</sub>) δ 1.05 (s, 3H), 1.37–1.49

(m, 2H), 1.71–1.78 (m, 1H), 1.81–1.91 (m, 2H), 1.97 (dd,  $J = 13.2, 2.5$  Hz, 1H), 2.23 (dd,  $J = 17.9, 8.9$  Hz, 1H), 2.34–2.39 (m, 1H), 2.67 (dd,  $J = 11.3, 11.3$  Hz, 1H), 2.83 (dd,  $J = 11.9, 3.8$  Hz, 1H), 2.94 (dd,  $J = 10.6, 3.9$  Hz, 1H), 3.07 (dd,  $J = 8.6, 8.6$  Hz, 1H), 3.80 (s, 3H), 6.86 (d,  $J = 8.5$  Hz, 2H), 7.20 (d,  $J = 8.6$  Hz, 2H);  $^{13}\text{C}$  NMR (125 MHz,  $\text{CDCl}_3$ )  $\delta$  21.3, 29.6, 30.1, 44.3, 51.4, 53.7, 53.7, 55.2, 59.4, 70.4, 113.7, 130.3, 131.9, 158.6; IR (neat) 3416, 2961, 1611, 1512, 1246, 1178, 833  $\text{cm}^{-1}$ ; HRMS (ESI+)  $m/e$  calc'd for  $[\text{M}+\text{H}]^+$   $\text{C}_{16}\text{H}_{24}\text{NO}_2$ : 262.1807, found 262.1790.  $[\alpha]_D^{22} = -6.54$  ( $c$  1.10,  $\text{CHCl}_3$ ).

Note: 1D NOE  $^1\text{H}$  NMR spectrum irradiating at 1.06 ppm shows peaks at 1.49, 1.97, 2.83 and 7.2 ppm. No peaks were seen at 3.07 or 2.67 ppm.

OPTIMIZATION OF DEHYDRATION CONDITIONS.

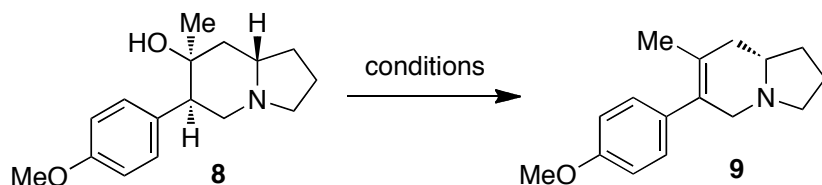

| entry | conditions                                                                | yield (%) <sup>a</sup> |
|-------|---------------------------------------------------------------------------|------------------------|
| 1     | $\text{I}_2$ , $\text{PPh}_3$ , $\text{CH}_2\text{Cl}_2$ , 16 h           | NR                     |
| 2     | $\text{BF}_3 \cdot \text{OEt}_2$ , $\text{CH}_2\text{Cl}_2$ , 16 h        | NR                     |
| 3     | $\text{POCl}_3$ , pyridine                                                | 30                     |
| 4     | $\text{TsOH}$ , $\text{AcOH}$ , reflux                                    | NR                     |
| 5     | $\text{TsOH}$ , $\text{PhMe}$ , reflux                                    | NR                     |
| 6     | $\text{SOCl}_2$ , pyridine, rt                                            | 52                     |
| 7     | $\text{SOCl}_2$ (5.0 equiv), pyridine (5.0 equiv), THF, $-30$ °C to rt    | 78                     |
| 8     | $\text{SOCl}_2$ (2.5 equiv), pyridine (5.0 equiv), THF, $-30$ to $-10$ °C | 88                     |

NR = no reaction (*i.e.* starting material was recovered). <sup>a</sup> Isolated yield.

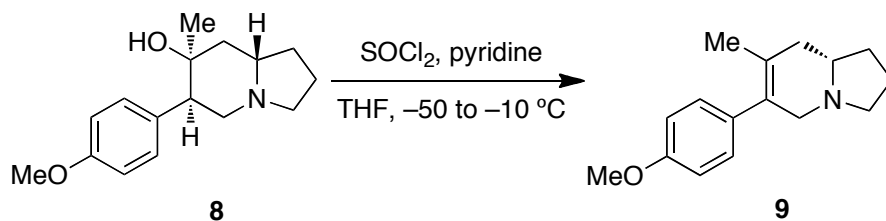

**6-(4-Methoxyphenyl)-7-methyl-1,2,3,5,8,8a-hexahydroindolizine (9).** Indolizidine **8** (62 mg, 0.24 mmol, 1.0 equiv) was dissolved in anhydrous THF (4.0 mL) and cooled to  $-50 \text{ }^\circ\text{C}$ . Pyridine (0.1 mL) followed by  $\text{SOCl}_2$  (0.043 mL, 0.59 mmol, 2.5 equiv) in 0.5 mL THF was added dropwise to the reaction mixture. The reaction mixture was kept between  $-30$  and  $-10 \text{ }^\circ\text{C}$  for 1.5 h. The reaction was quenched with 10% NaOH (*aq.*). The quenched reaction mixture was added to a separatory funnel containing 10% NaOH (*aq.*) and the product was extracted with EtOAc (3x). The combined organic layers were dried over  $\text{Na}_2\text{SO}_4$  and concentrated *in vacuo*. The title compound was obtained as a colorless oil (51 mg, 88% yield) after  $\text{SiO}_2$  flash chromatography [20% EtOAc/hexanes (1% TEA)]. See below for spectral data.

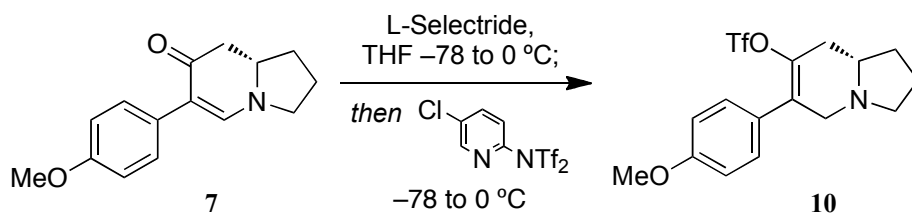

**(S) - 6 - (4-Methoxyphenyl) - 1, 2, 3, 5, 8, 8a - hexahydroindolizin - 7 - yl - trifluoromethanesulfonate (10).** Enaminone **7** (590 mg, 2.4 mmol, 1.0 equiv) was dissolved in anhydrous THF (30 mL) under a  $\text{N}_2$  atmosphere. The solution was cooled to  $-78 \text{ }^\circ\text{C}$  at which point L-Selectride (0.23 mL, 0.23 mmol, 1.0 equiv, 1.0 M in THF) was added over 15 min. After stirring for 1 h, the reaction was slowly warmed to  $0 \text{ }^\circ\text{C}$  over 2 h. The reaction mixture was once again cooled to  $-78 \text{ }^\circ\text{C}$  and Comins reagent (1.1 g, 2.7 mmol, 1.1 equiv) was added all at once. The mixture was stirred for another hour at  $-78 \text{ }^\circ\text{C}$  and then slowly warmed to  $0 \text{ }^\circ\text{C}$  over 2 h. The reaction was quenched with a saturated solution of  $\text{NaHCO}_3$  (*aq.*) and added to a separatory funnel. The product was extracted with EtOAc (3x). The combined organic layers were dried over  $\text{Na}_2\text{SO}_4$  and concentrated *in vacuo*. The title compound was obtained as a colorless oil (690 mg,



76% yield) after SiO<sub>2</sub> flash chromatography (10% EtOAc/hexanes (1% TEA): <sup>1</sup>H NMR (500 MHz, CDCl<sub>3</sub>) δ 1.49-1.57 (m, 1H), 1.76-1.84 (m, 1H), 1.87-1.96 (m, 1H), 2.00-2.07 (m, 1H), 2.22 (dd, *J* = 18.1, 9.2 Hz, 1H), 2.47-2.62 (m, 3H), 3.06 (d, *J* = 15.8 Hz, 1H), 3.18 (dt, *J* = 4.4, 2.1 Hz, 1H), 3.72-3.75 (m, 1H), 3.74 (s, 3H), 6.83 (d, *J* = 8.8 Hz, 2H), 7.14 (d, *J* = 8.8 Hz, 2H); <sup>13</sup>C NMR (125 MHz, CDCl<sub>3</sub>) δ 22.2, 30.5, 35.2, 53.4, 55.3, 55.6, 60.5, 113.9, 118.1 (q, *J*<sub>CF</sub> = 320 Hz), 126.6, 129.2, 129.5, 142.0, 159.5; IR (neat) 2959, 1610, 1512, 1416, 1209, 1146 cm<sup>-1</sup>; HRMS (ESI+) *m/e* calc'd for [M+H]<sup>+</sup> C<sub>16</sub>H<sub>19</sub>F<sub>3</sub>NO<sub>4</sub>S: 378.0987, found 378.0974; [α]<sub>D</sub><sup>22</sup> = +66.3 (*c* 1.00, CHCl<sub>3</sub>).

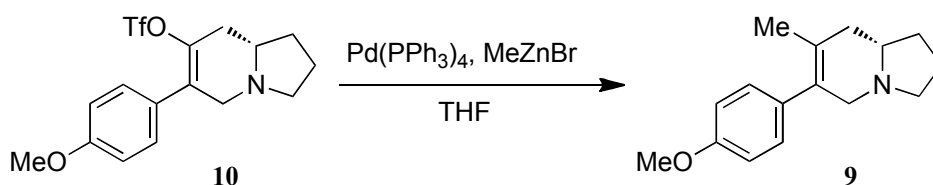

**(S)-6-(4-Methoxyphenyl)-7-methyl-1,2,3,5,8,8a-hexahydroindolizine (9).** *Preparation*

*of organo zinc reagent.* A flame dried RBF under N<sub>2</sub> was charged with anhydrous THF (10.0 mL) and cooled to -78 °C. Methyl lithium (1.6 mL, 2.5 mmol, 5.0 equiv, 1.6M in Et<sub>2</sub>O) was added and the solution was allowed to sit. A separate RBF was charged with anhydrous ZnBr<sub>2</sub> (590 mg, 2.6 mmol, 5.2 equiv). The ZnBr<sub>2</sub> was dried by heating the RBF under a vacuum with a heat gun for 5 min. When the ZnBr<sub>2</sub> had cooled to room temperature it was dissolved in anhydrous THF (6.0 mL) under N<sub>2</sub>. This ZnBr<sub>2</sub> solution was slowly cannulated into the methyl lithium solution and the resulting solution was stirred at -78 °C for 5 min and then allowed to warm to room temperature.

Triflate **10** (190 mg, 0.50 mmol, 1.0 equiv), dissolved in a minimal amount of THF, and Pd(PPh<sub>3</sub>)<sub>4</sub> (29 mg, 0.025 mmol, 5.0 mol%) were added sequentially to the zinc reagent. If the reaction had not gone to completion after 1 h at room temperature, the reaction mixture was heated to 50 °C. Upon consumption of the triflate starting material (as judged by TLC) SiO<sub>2</sub> was added to the reaction mixture and the solvent was evaporated to leave a free flowing powder. Following flash chromatography (80% EtOAc/hexanes (1% TEA)) 110 mg (91%) of the title compound was obtained as a colorless oil: <sup>1</sup>H NMR (400 MHz, CDCl<sub>3</sub>) δ 1.46-1.54 (m, 1H), 1.60 (s, 3H), 1.73-1.81 (m, 1H), 1.85-1.94 (m, 1H), 2.00-2.32 (m, 5H), 2.91 (d, *J* = 15.4 Hz, 1H), 3.22 (dd, *J* = 3.2, 3.2 Hz, 1H),

3.62 (d,  $J = 15.4$  Hz, 1H), 3.82 (s, 3H), 6.86 (d,  $J = 8.7$  Hz, 2H), 7.10 (d,  $J = 8.7$  Hz, 2H);  $^{13}\text{C}$  NMR (100 MHz,  $\text{CDCl}_3$ )  $\delta$  20.0, 21.4, 30.8, 38.5, 54.2, 55.2, 57.8, 60.2, 113.5, 127.9, 130.0, 130.3, 133.8, 158.1; IR (neat) 2907, 1609, 1510, 1244, 1175, 831  $\text{cm}^{-1}$ ; HRMS (ESI+)  $m/e$  calc'd for  $[\text{M}+\text{H}]^+$   $\text{C}_{16}\text{H}_{22}\text{NO}$ : 244.1701, found 244.1688;  $[\alpha]_D^{22} = +142$  (c 1.00,  $\text{CHCl}_3$ ).

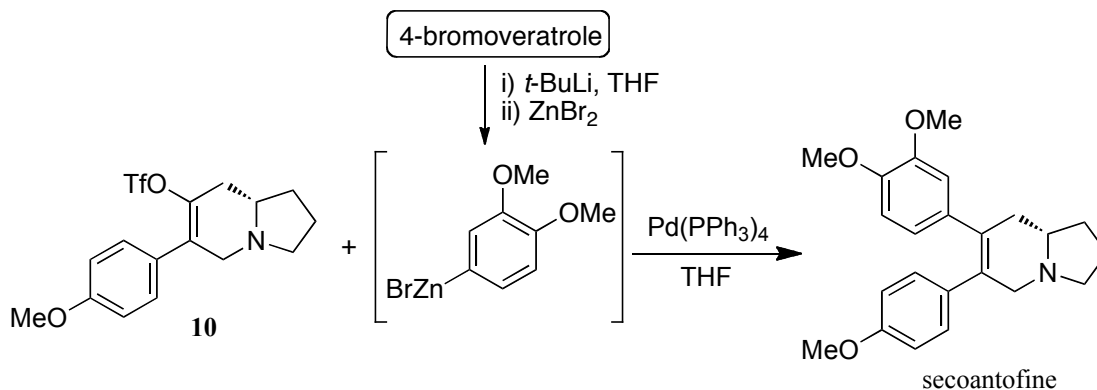

**(+)-Secoantofine.** *Preparation of organo zinc reagent.* A flame dried RBF under  $\text{N}_2$  was charged with anhydrous THF (15.0 mL) and cooled to  $-78$  °C. *tert*-Butyllithium (6.6 mL, 11 mmol, 11 equiv, 1.7 M in pentane) was added carefully and the solution was allowed to sit for 5 min at  $-78$  °C. 4-Bromoveratrole (1.2 g, 5.4 mmol, 5.0 equiv) was then added dropwise and the resulting reaction mixture was stirred for 2 h and  $-78$  °C. A different RBF was charged with anhydrous  $\text{ZnBr}_2$  (1.3 g, 5.6 mmol, 5.2 equiv). The  $\text{ZnBr}_2$  was dried by heating the RBF under a vacuum with a heat gun for 5 min. When the  $\text{ZnBr}_2$  had cooled to room temperature it dissolved in anhydrous THF (12.0 mL) under  $\text{N}_2$ . This  $\text{ZnBr}_2$  solution was slowly cannulated into the yellow aryllithium reagent solution. The resulting cloudy white solution was stirred at  $-78$  °C for 5 min and then allowed to warm to room temperature. Upon warming the solution became clear. Triflate **10** (400 mg, 1.1 mmol, 1.0 equiv) (dissolved in a minimal amount of THF) and  $\text{Pd}(\text{PPh}_3)_4$  (62 mg, 0.054 mmol, 5.0 mol%) were added sequentially to the zinc reagent. If the reaction had not gone to completion after 1 h at room temperature, the reaction mixture was heated to 50 °C. Upon consumption of the triflate starting material (as judged by TLC)  $\text{SiO}_2$  was added to the reaction mixture and the solvent was evaporated to leave a free flowing powder. Following flash chromatography [40% EtOAc/hexanes (1% TEA)] 380 mg

(96%) of the title compound was obtained as a yellow oil:  $^1\text{H}$  NMR (400 MHz,  $\text{CDCl}_3$ )  $\delta$  1.51-1.63 (m, 1H), 1.78-2.01 (m, 2H), 2.06-2.14 (m, 1H), 2.25 (dd,  $J = 9.0, 9.0$  Hz, 1H), 2.36-2.45 (m, 2H), 2.69-2.77 (m, 1H), 3.07 (dt,  $J = 16.0, 3.1$  Hz, 1H), 3.29 (dt,  $J = 4.3, 2.0$  Hz, 1H), 3.54 (s, 3H), 3.72 (s, 3H), 3.81 (s, 3H), 3.86 (d,  $J = 15.8$  Hz, 1H), 6.47 (d,  $J = 1.1$  Hz, 1H), 6.66-6.69 (m, 4H), 6.97 (d,  $J = 8.8$  Hz, 2H);  $^{13}\text{C}$  NMR (100 MHz,  $\text{CDCl}_3$ )  $\delta$  21.5, 30.8, 38.6, 54.3, 55.1, 55.5, 55.7, 57.9, 60.4, 110.4, 113.1, 113.4, 120.7, 130.2, 132.6, 132.7, 133.6, 135.1, 147.1, 147.9, 158.0; IR (neat) 2955, 1607, 1511, 1245, 1030, 755  $\text{cm}^{-1}$ ; HRMS (ESI+)  $m/e$  calc'd for  $[\text{M}+\text{H}]^+$   $\text{C}_{23}\text{H}_{28}\text{NO}_3$ : 366.2064, found 366.2068;  $[\alpha]_D^{22} = +169$  ( $c$  1.00,  $\text{CHCl}_3$ ).

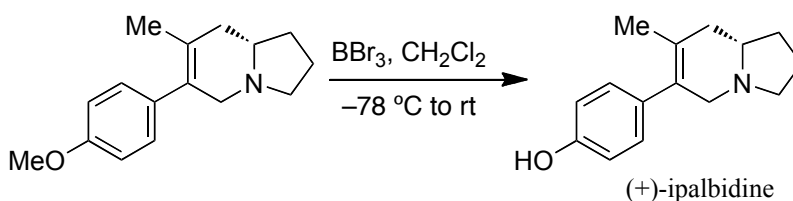

**(+)-Ipalbidine.** *O*-Methylipalbidine (56 mg, 0.23 mmol, 1.0 equiv) was dissolved in  $\text{CH}_2\text{Cl}_2$  (1.0 mL) and cooled to  $-78\text{ }^\circ\text{C}$  under  $\text{N}_2$ . To this solution was added  $\text{BBr}_3$  (0.23 mL, 0.23 mmol, 1.0 M in  $\text{CH}_2\text{Cl}_2$ ). The reaction was allowed to warm to room temperature over night. The reaction was quenched with water (1.0 mL) and then 5.0 mL of a saturated solution of  $\text{NaHCO}_3$  (aq.). The product was extracted from the aqueous layer with  $\text{CH}_2\text{Cl}_2$  (3x). The combined organic layers were dried with  $\text{Na}_2\text{SO}_4$ , concentrated and purified *via* flash chromatography [80% EtOAc/hexane (1% TEA)] to provide 42 mg (80%) of (+)-ipalbidine as a white crystalline solid (mp  $122.2\text{-}124.6\text{ }^\circ\text{C}$ ).  $^1\text{H}$  NMR (400 MHz,  $\text{CDCl}_3$ )  $\delta$  1.59 (s, 3H), 1.55-1.68 (m, 1H), 1.74-1.88 (m, 1H), 1.91-2.11 (m, 2H), 2.14-2.32 (m, 3H), 2.35-2.45 (m, 1H), 3.00 (dd,  $J = 15.6, 2.2$  Hz, 1H), 3.26 (ddd,  $J = 9.1, 9.1, 2.1$  Hz, 1H), 3.69 (d,  $J = 15.6$  Hz, 1H), 6.78 (d,  $J = 8.6$  Hz, 2H), 7.00 (d,  $J = 8.5$  Hz, 2H);  $^{13}\text{C}$  NMR (101 MHz,  $\text{CDCl}_3$ )  $\delta$  20.0, 21.1, 30.2, 37.6, 54.1, 57.7, 60.6, 115.5, 128.3, 129.7, 129.9, 132.0, 155.9; IR (neat) 2913, 1609, 1513, 1445, 1269, 1169  $\text{cm}^{-1}$ ; HRMS (ESI+)  $m/e$  calc'd for  $[\text{M}+\text{H}]^+$   $\text{C}_{15}\text{H}_{20}\text{NO}$ : 230.1545, found 230.1531;  $[\alpha]_D^{22} = +202$  ( $c$  1.00,  $\text{CHCl}_3$ ). [Lit. *S*-enantiomer:  $+233.5$  ( $c$  1,  $\text{CHCl}_3$ ); *R*-

*enantiomer*:  $-237$  (*c* 1, CHCl<sub>3</sub>),  $-190.5$  (*c* 1, CH<sub>3</sub>OH)].<sup>7</sup> The enantiomeric ratio of (+)-ipalbidine was determined to be 98.5:1.5 via chiral HPLC using a Chiralcel OJ column. Conditions: *i*-PrOH 2–20% in hexanes, 30 min, 1.0 mL/min, 30 °C. (–)-Enantiomer:  $R_t = 18.5$  min; (+)-Enantiomer:  $R_t = 21.5$  min.

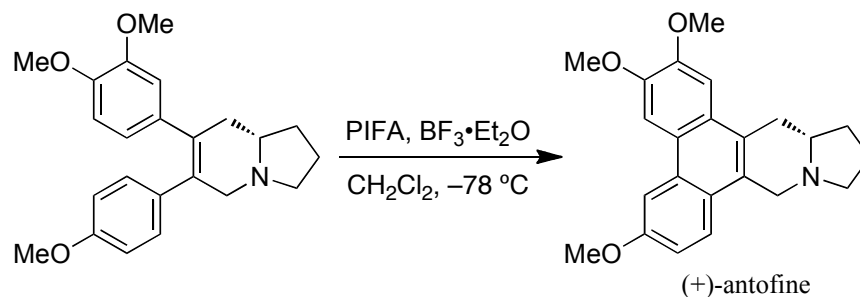

**(+)-Antofine.** Secoantofine (48 mg, 0.13 mmol, 1.0 equiv) was dissolved in CH<sub>2</sub>Cl<sub>2</sub> (2.0 mL) and cooled to  $-78$  °C. To this solution was added PIFA (62 mg, 0.14 mmol, 1.1 equiv) and BF<sub>3</sub>·Et<sub>2</sub>O (16 mg, 0.14 mmol, 1.1 equiv) sequentially. The solution was stirred for 4 h while being monitored by TLC. A solution of PIFA (62 mg in 2.0 mL CH<sub>2</sub>Cl<sub>2</sub>) was added dropwise to the reaction mixture until the reaction had gone to completion. Upon consumption of starting material the reaction was quenched with 10% NaOH (*aq.*) and the mixture was vigorously stirred for 1 h. The product was extracted from the aqueous layer with CH<sub>2</sub>Cl<sub>2</sub> (3x). The combined organic layers were dried with Na<sub>2</sub>SO<sub>4</sub>, concentrated and purified *via* flash chromatography [70% EtOAc/hexane (1% TEA)] to provide 34 mg (70%) of (+)-antofine as a white crystalline solid: mp 226–227 °C (decomp.) <sup>1</sup>H NMR (400 MHz, CDCl<sub>3</sub>)  $\delta$  1.65–1.75 (m, 1H), 1.80–2.02 (m, 2H), 2.13–2.22 (m, 1H), 2.35–2.46 (m, 2H), 2.79–2.86 (m, 1H), 3.28 (ddd, *J* = 15.8, 3.7, 1.5 Hz, 1H), 3.38 (dt, *J* = 4.3, 2.1 Hz, 1H), 3.63 (d, *J* = 14.9 Hz, 1H), 3.95 (s, 3H), 3.99 (s, 3H), 4.04 (s, 3H), 4.63 (d, *J* = 14.9 Hz, 1H), 7.13 (dd, *J* = 9.0, 2.5 Hz, 1H), 7.25 (s, 1H), 7.75 (d, *J* = 9.0 Hz, 1H), 7.83 (d, *J* = 2.5 Hz, 1H), 7.85 (s, 1H); <sup>13</sup>C NMR (100 MHz, CDCl<sub>3</sub>)  $\delta$  21.6, 31.3, 33.7, 53.8, 55.0, 55.5, 55.9, 56.0, 60.3, 104.0, 104.7, 114.9, 123.5, 124.1, 124.2, 125.5, 126.7, 127.0, 130.2, 148.4, 149.4, 157.5; HRMS (ESI+) *m/e* calc'd for [M+H]<sup>+</sup> C<sub>23</sub>H<sub>26</sub>NO<sub>3</sub>: 364.1913, found 364.1909; [ $\alpha$ ]<sub>D</sub><sup>22</sup> = + 111 (*c* 1.00, CHCl<sub>3</sub>). [Lit. *R*-enantiomer:  $- 113.4$  (*c* 1.23, CHCl<sub>3</sub>),<sup>8</sup>  $-125.2$  (*c* 1.27, CHCl<sub>3</sub>),<sup>9</sup>  $- 108.2$  (*c* 0.71, CHCl<sub>3</sub>);<sup>10</sup> *S*-enantiomer: + 66 (CHCl<sub>3</sub>)<sup>11</sup>].

## REFERENCES

- (1) (a) Plucinska, K.; Liberek, B. Synthesis of diazoketones derived from  $\alpha$ -amino acids - Problem of side reactions. *Tetrahedron* **1987**, *43*, 3509-3517; (b) Vasanthakumar, G. R.; Patil, B. S.; Babu, V. V. S. Homologation of  $\alpha$ -amino acids to  $\beta$ -amino acids using  $\text{Boc}_2\text{O}$ . *J. Chem. Soc., Perk. Trans. I* **2002**, 2087-2089.
- (2) Woo, J. C. S.; Fenster, E.; Dake, G. R. A convenient method for the conversion of hindered carboxylic acids to *N*-methoxy-*N*-methyl (Weinreb) amides. *J. Org. Chem.* **2004**, *69*, 8984-8986.
- (3) Kimball, F. S.; Turunen, B. J.; Ellis, K. C.; Himes, R. H.; Georg, G. I. Enantiospecific synthesis and cytotoxicity of 7-(4-methoxyphenyl)-6-phenyl-2,3,8,8a-tetrahydroindolizin-5(1*H*)-one enantiomers. *Biorg. Med. Chem.* **2008**, *16*, 4367-4377.
- (4) (a) Turunen, B. J.; Georg, G. I. Amino acid-derived enamines: A study in ring formation providing valuable asymmetric synthons. *J. Am. Chem. Soc.* **2006**, *128*, 8702-8703. (b) Niphakis, M. J.; Turunen, B. J.; Georg, G. I. Synthesis of 6- and 7-membered cyclic enamines: Scope and mechanism. *J. Org. Chem.* **2010**, (submitted).
- (5) Ge, H.; Niphakis, M. J.; Georg, G. I. Palladium(II)-catalyzed direct arylation of enamines using organotrifluoroborates. *J. Am. Chem. Soc.* **2008**, *130*, 3708-3709.
- (6) Jefford, C. W.; Kubota, T.; Zaslona, A. Intramolecular carbenoid reactions of pyrrole derivatives. A total synthesis of ( $\pm$ )-ipalbidine. *Helv. Chim. Acta* **1986**, *69*, 2048-2061.
- (7) Wick, A. E.; Bartlett, P. A.; Dolphin, D. Total synthesis of ipalbidine and ipalbine. *Helv. Chim. Acta* **1971**, *54*, 513-522.
- (8) Furstner, A.; Kennedy, J. W. J. Total syntheses of the tylophora alkaloids cryptopleurine, (-)-antofine, (-)-tylophorine, and (-)-ficuseptine C. *Chem. Eur. J.* **2006**, *12*, 7398-7410.
- (9) Kim, S.; Lee, T.; Lee, E.; Lee, J.; Fan, G.-J.; Lee, S. K.; Kim, D. Asymmetric total syntheses of (-)-antofine and (-)-cryptopleurine using (*R*)-(*E*)-4-(tributylstannyl)but-3-en-2-ol. *J. Org. Chem.* **2004**, *69*, 3144-3149.
- (10) Kim, S.; Lee, J.; Lee, T.; Park, H. G.; Kim, D. First asymmetric total synthesis of (-)-antofine by using an enantioselective catalytic phase transfer alkylation. *Org. Lett.* **2003**, *5*, 2703-2706.
- (11) Faber, L.; Wiegrebe, W. Stereospecific synthesis of a 9,11,12,13,13a,14-hexahydrodibenzo(f,h)pyrrolo (1,2-b)isoquinoline alkaloid. *Helv. Chim. Acta* **1973**, *56*, 2882-2884.

## HPLC DATA

Partially racemized ipalbidine was prepared by carrying through enaminone **5** which had been prepared according to the HCl conditions reported in the first disclosure of this reaction.<sup>4</sup>

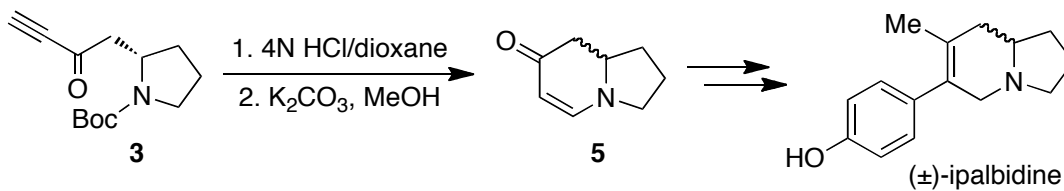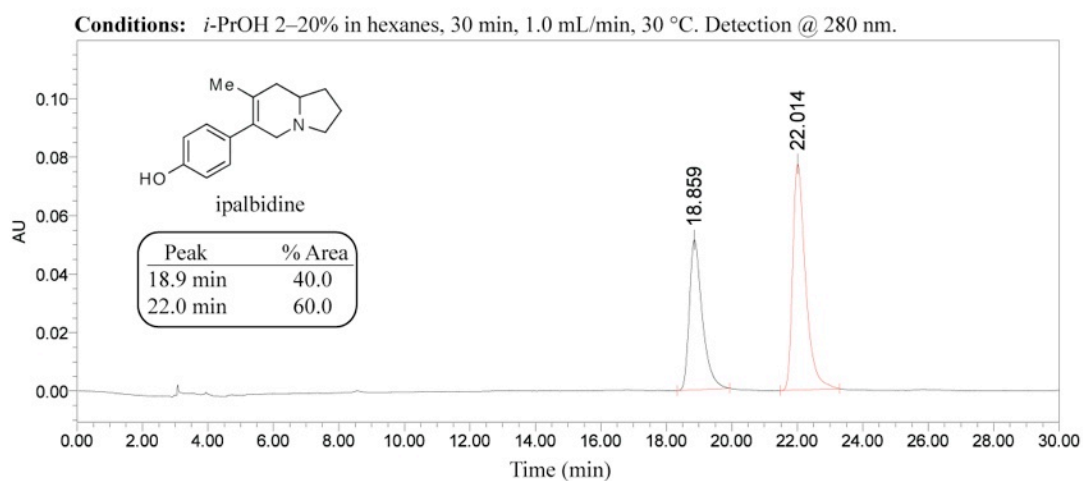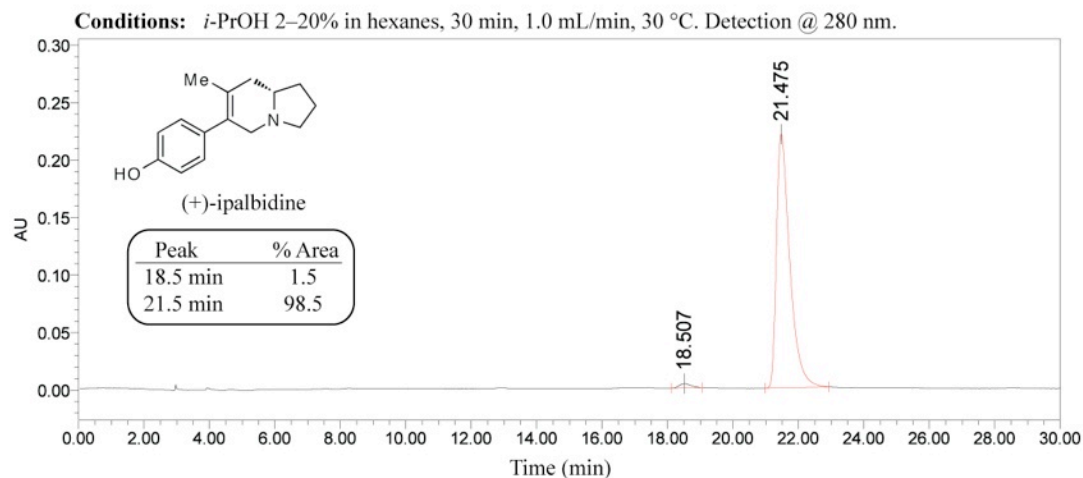

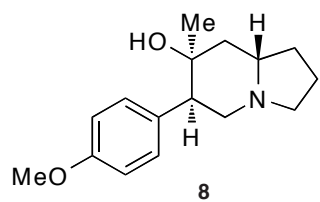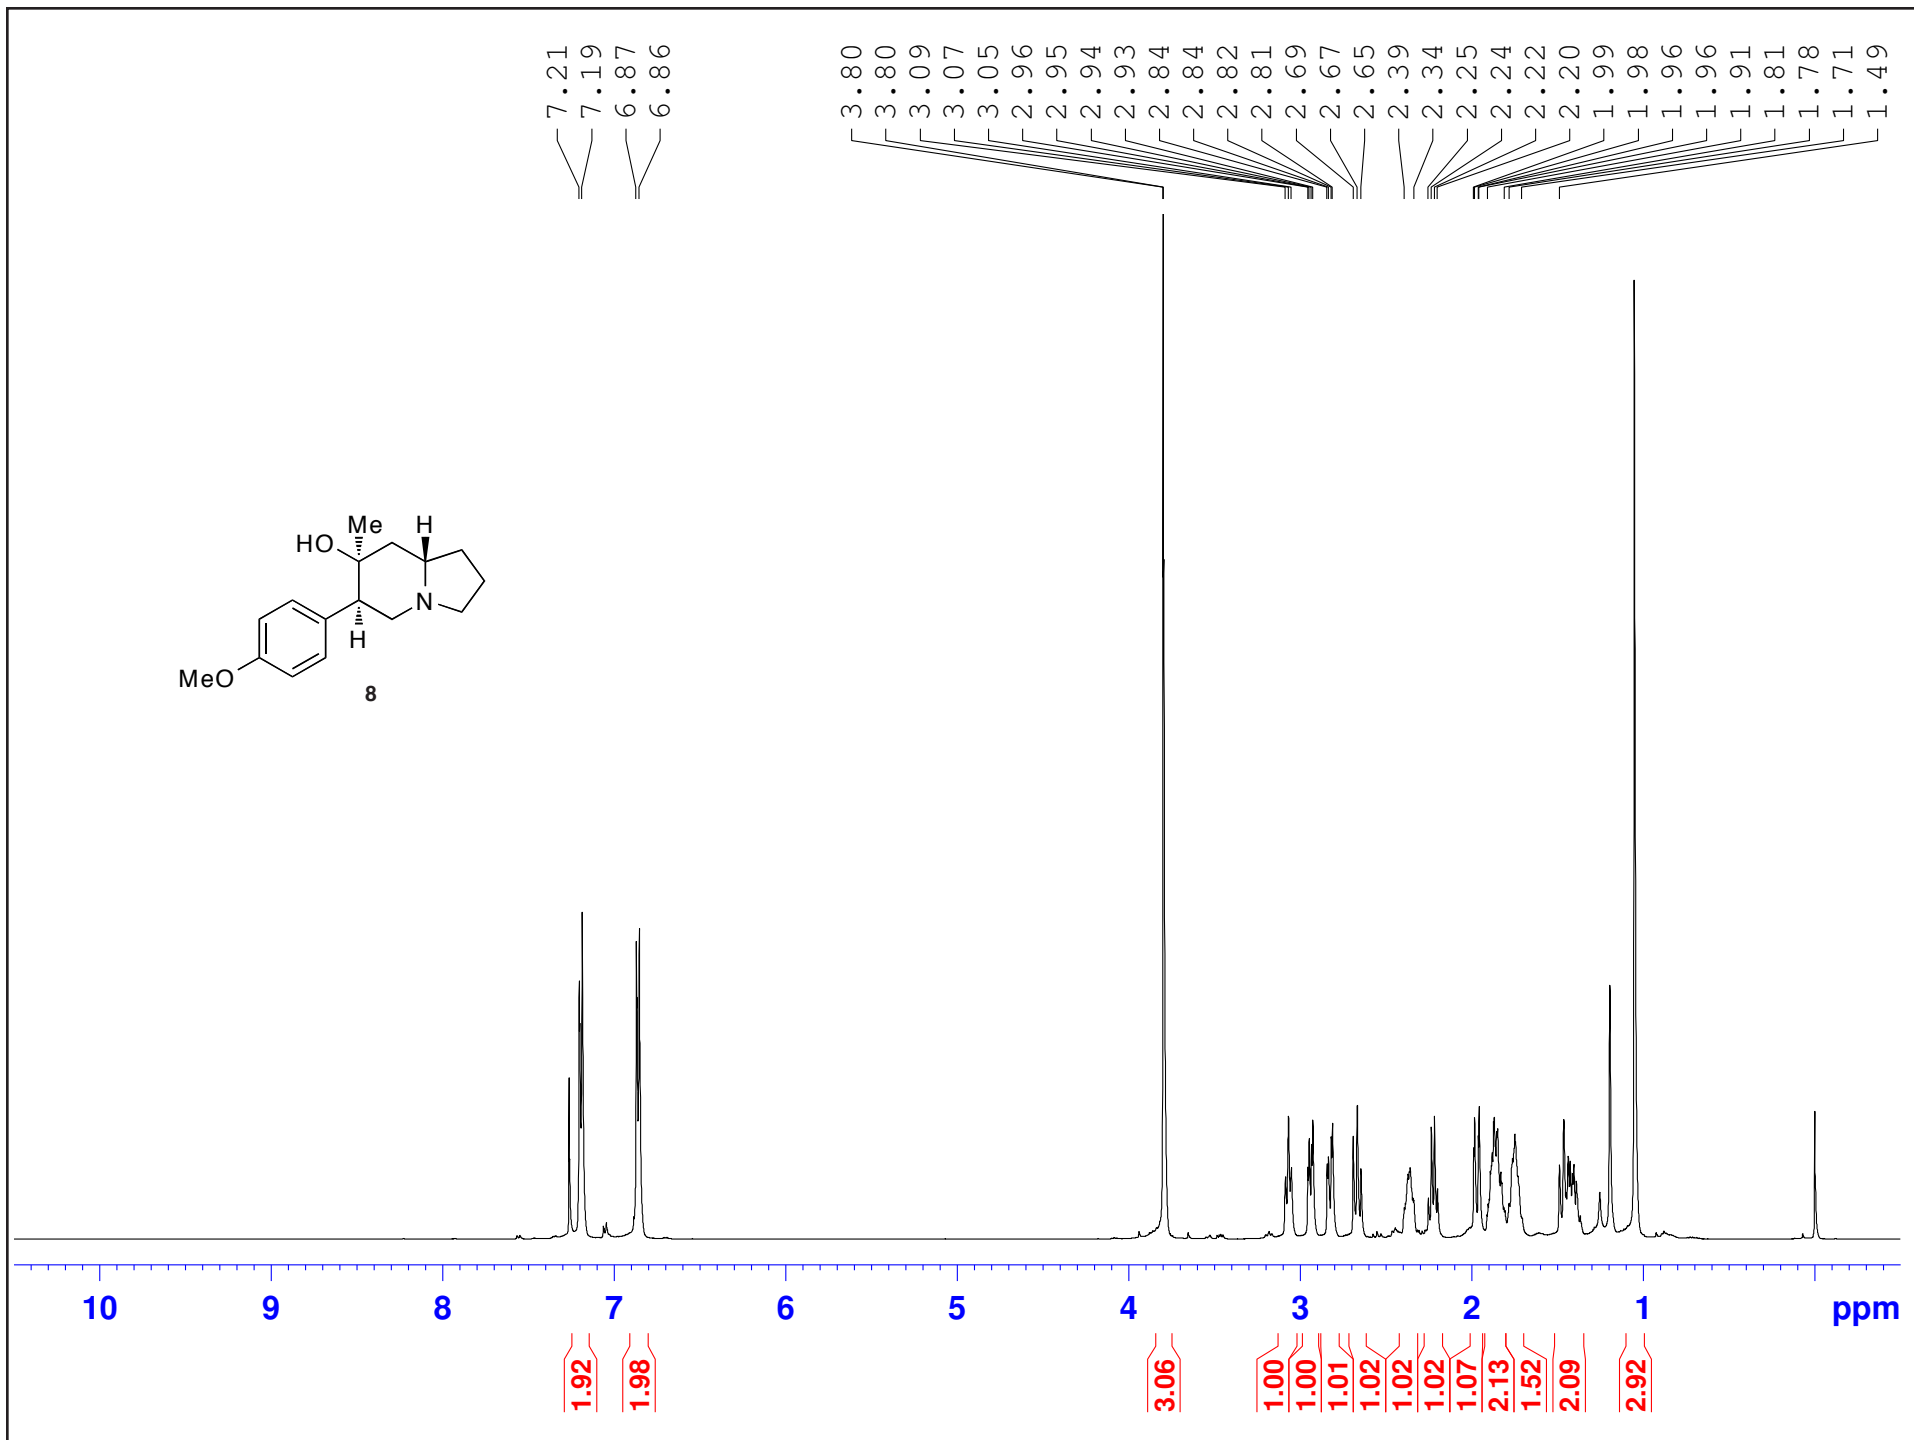

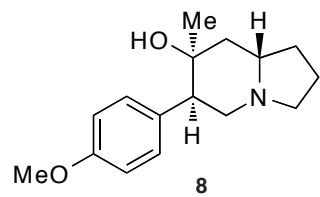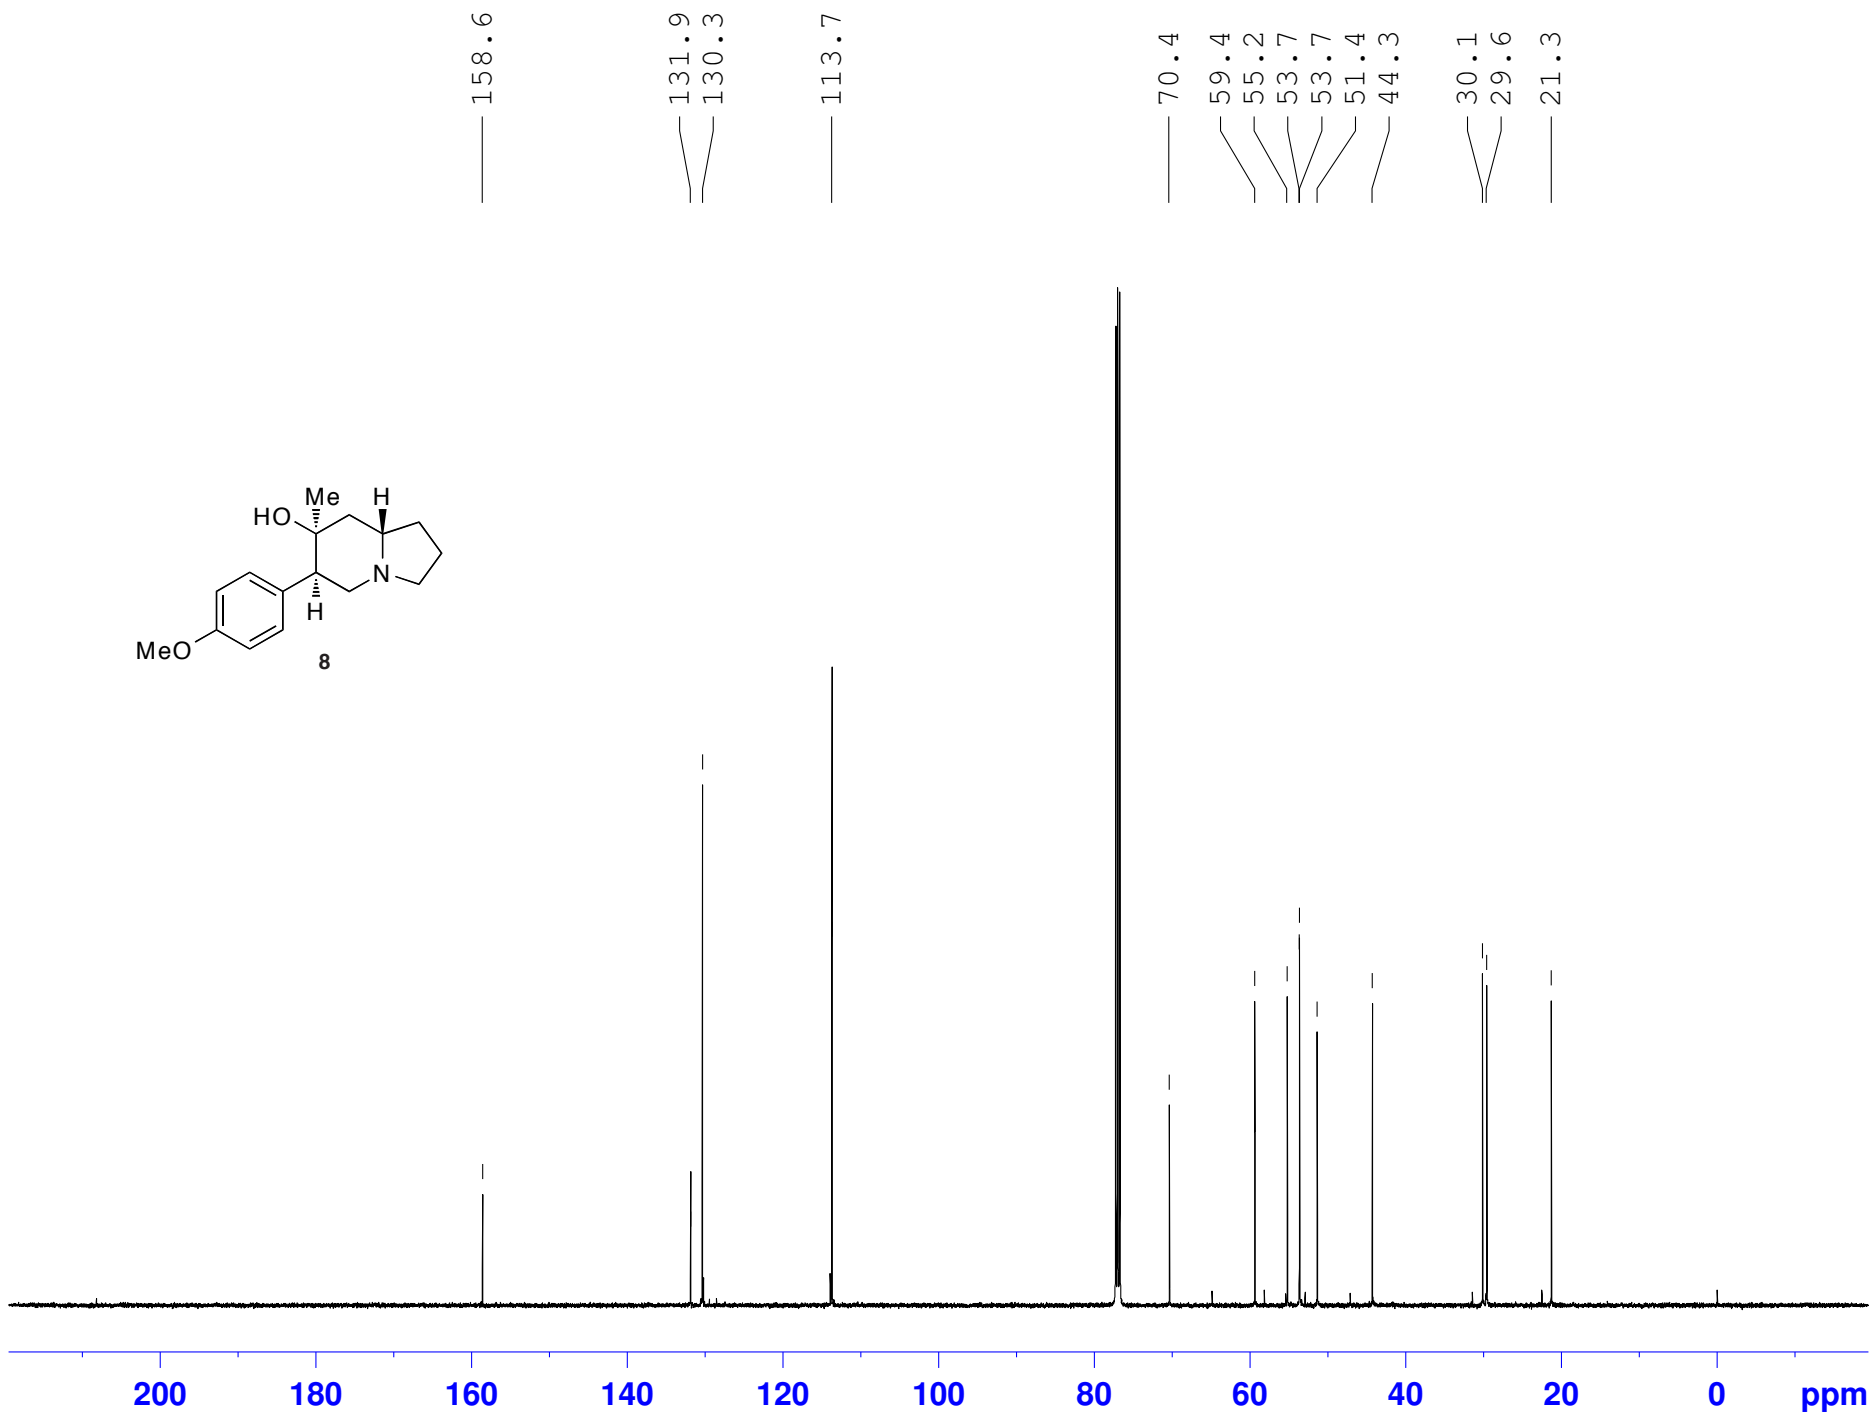



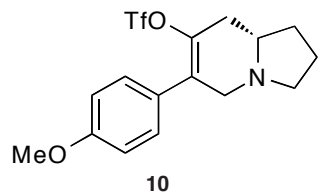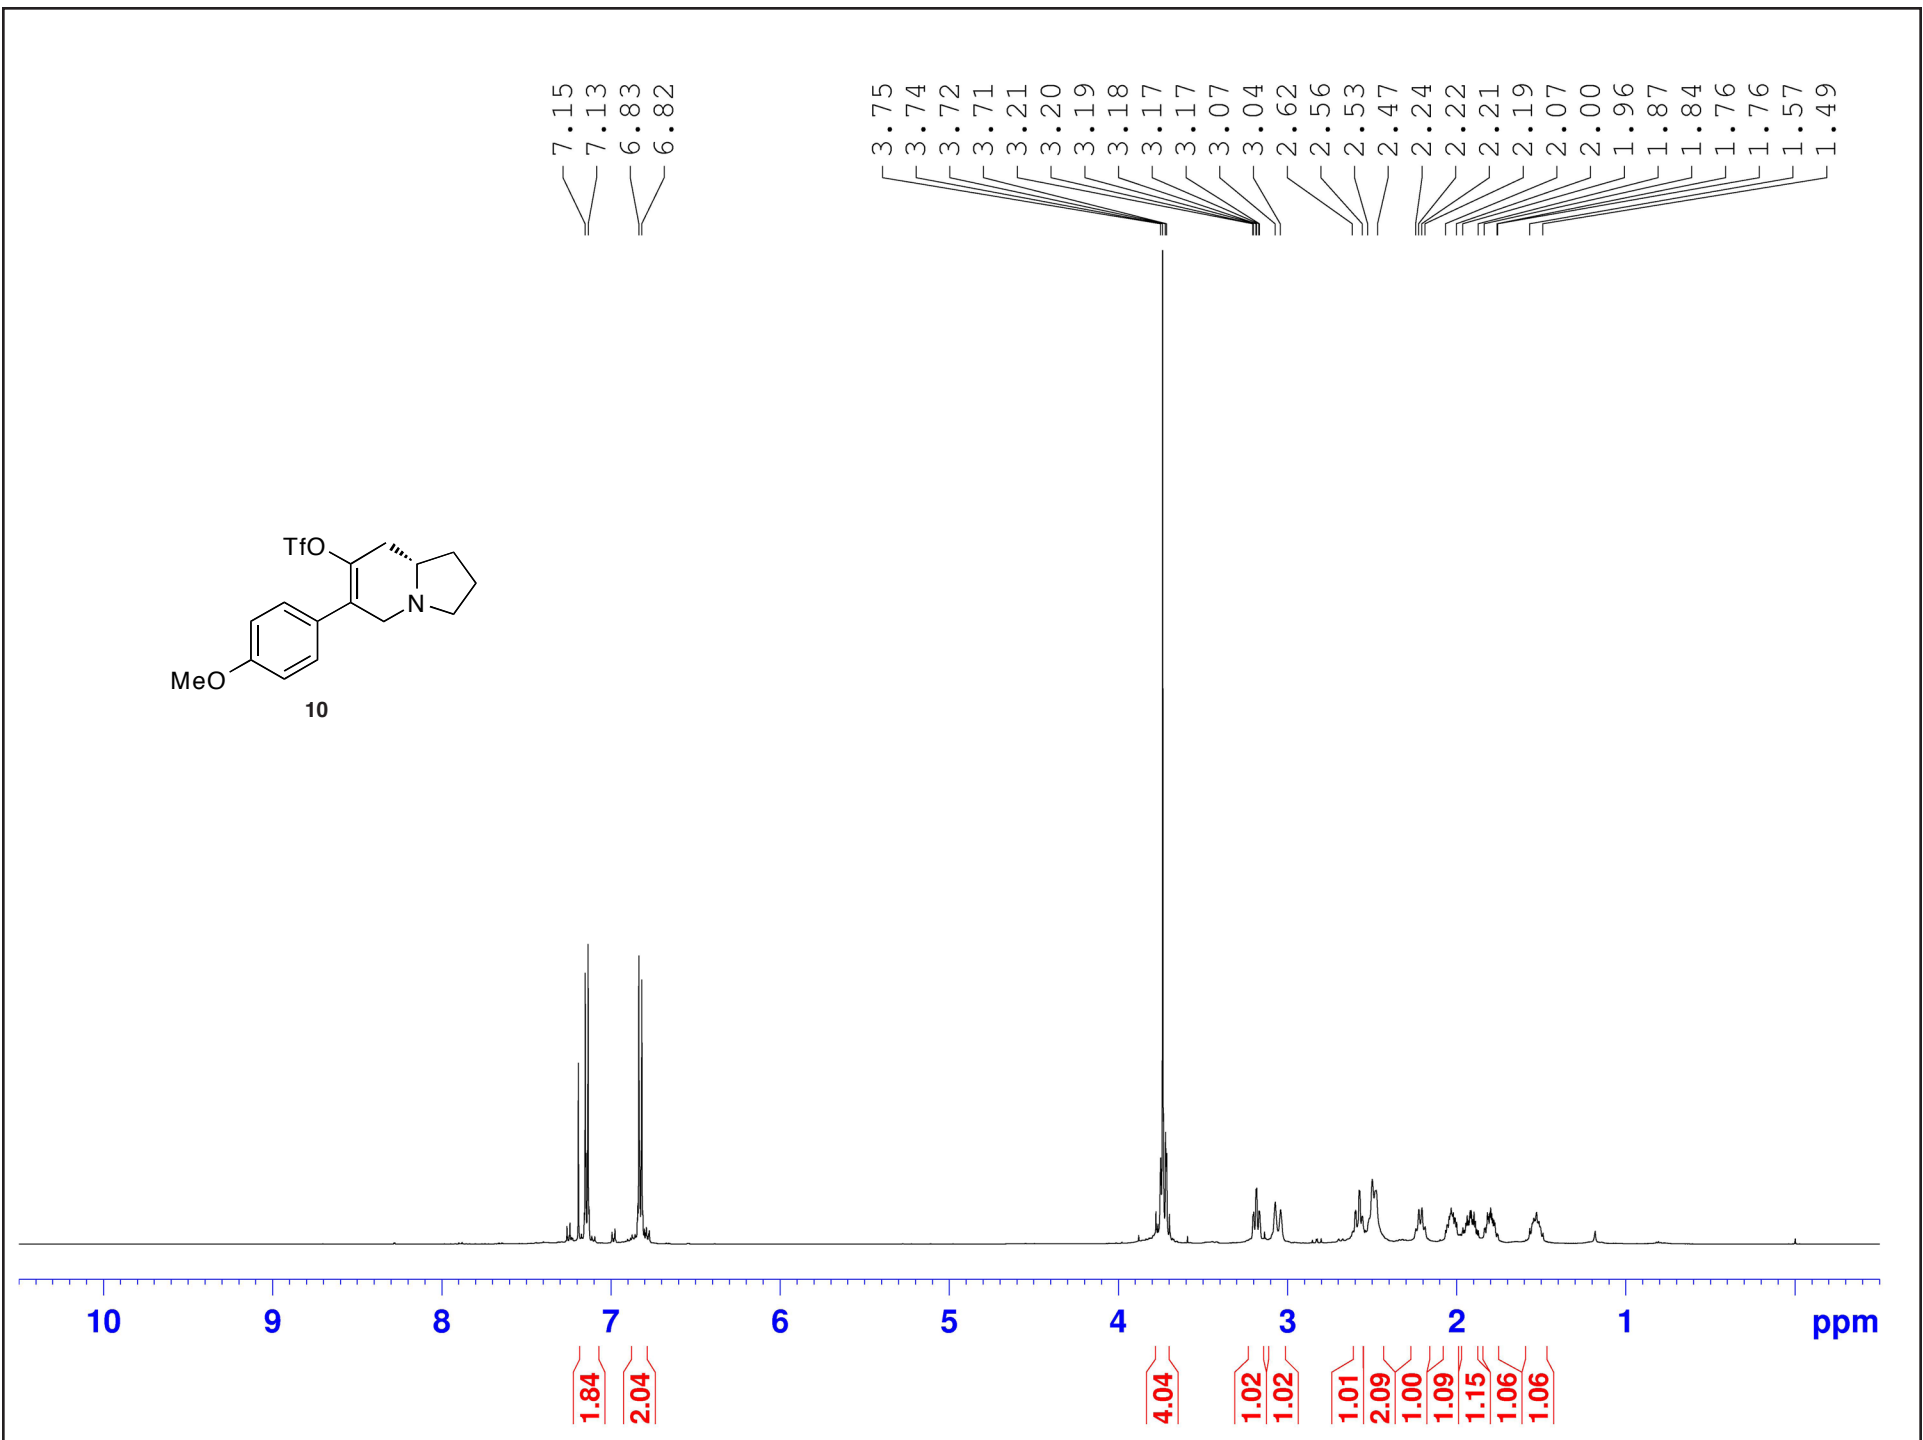

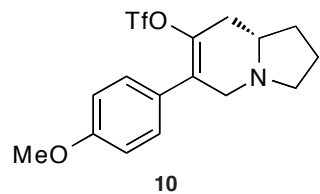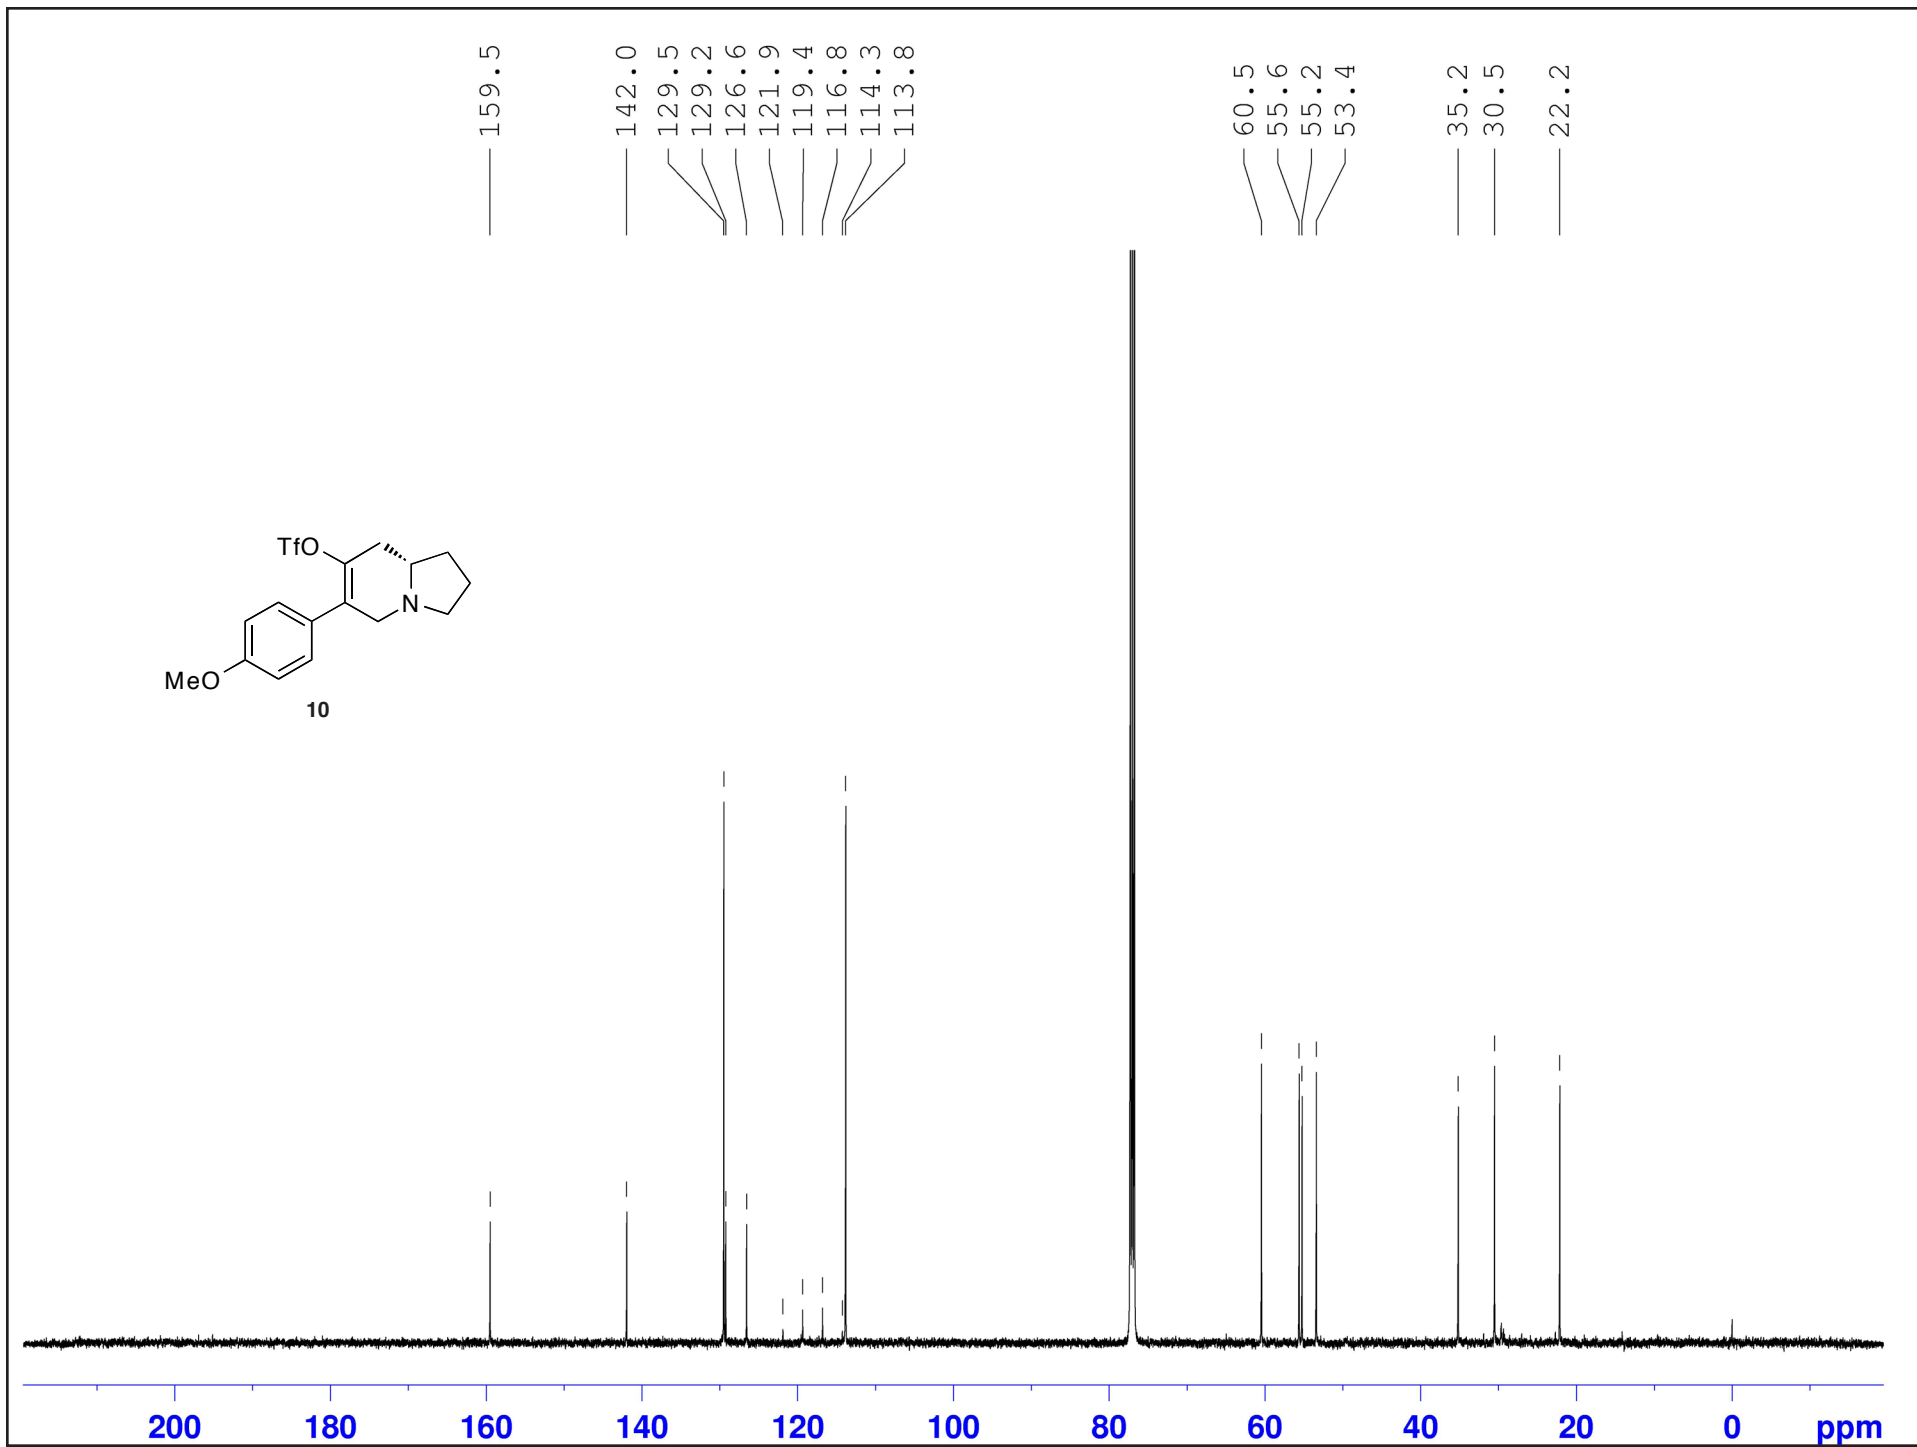

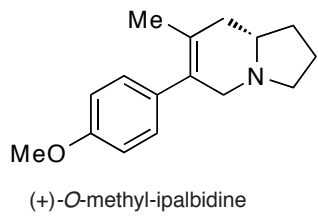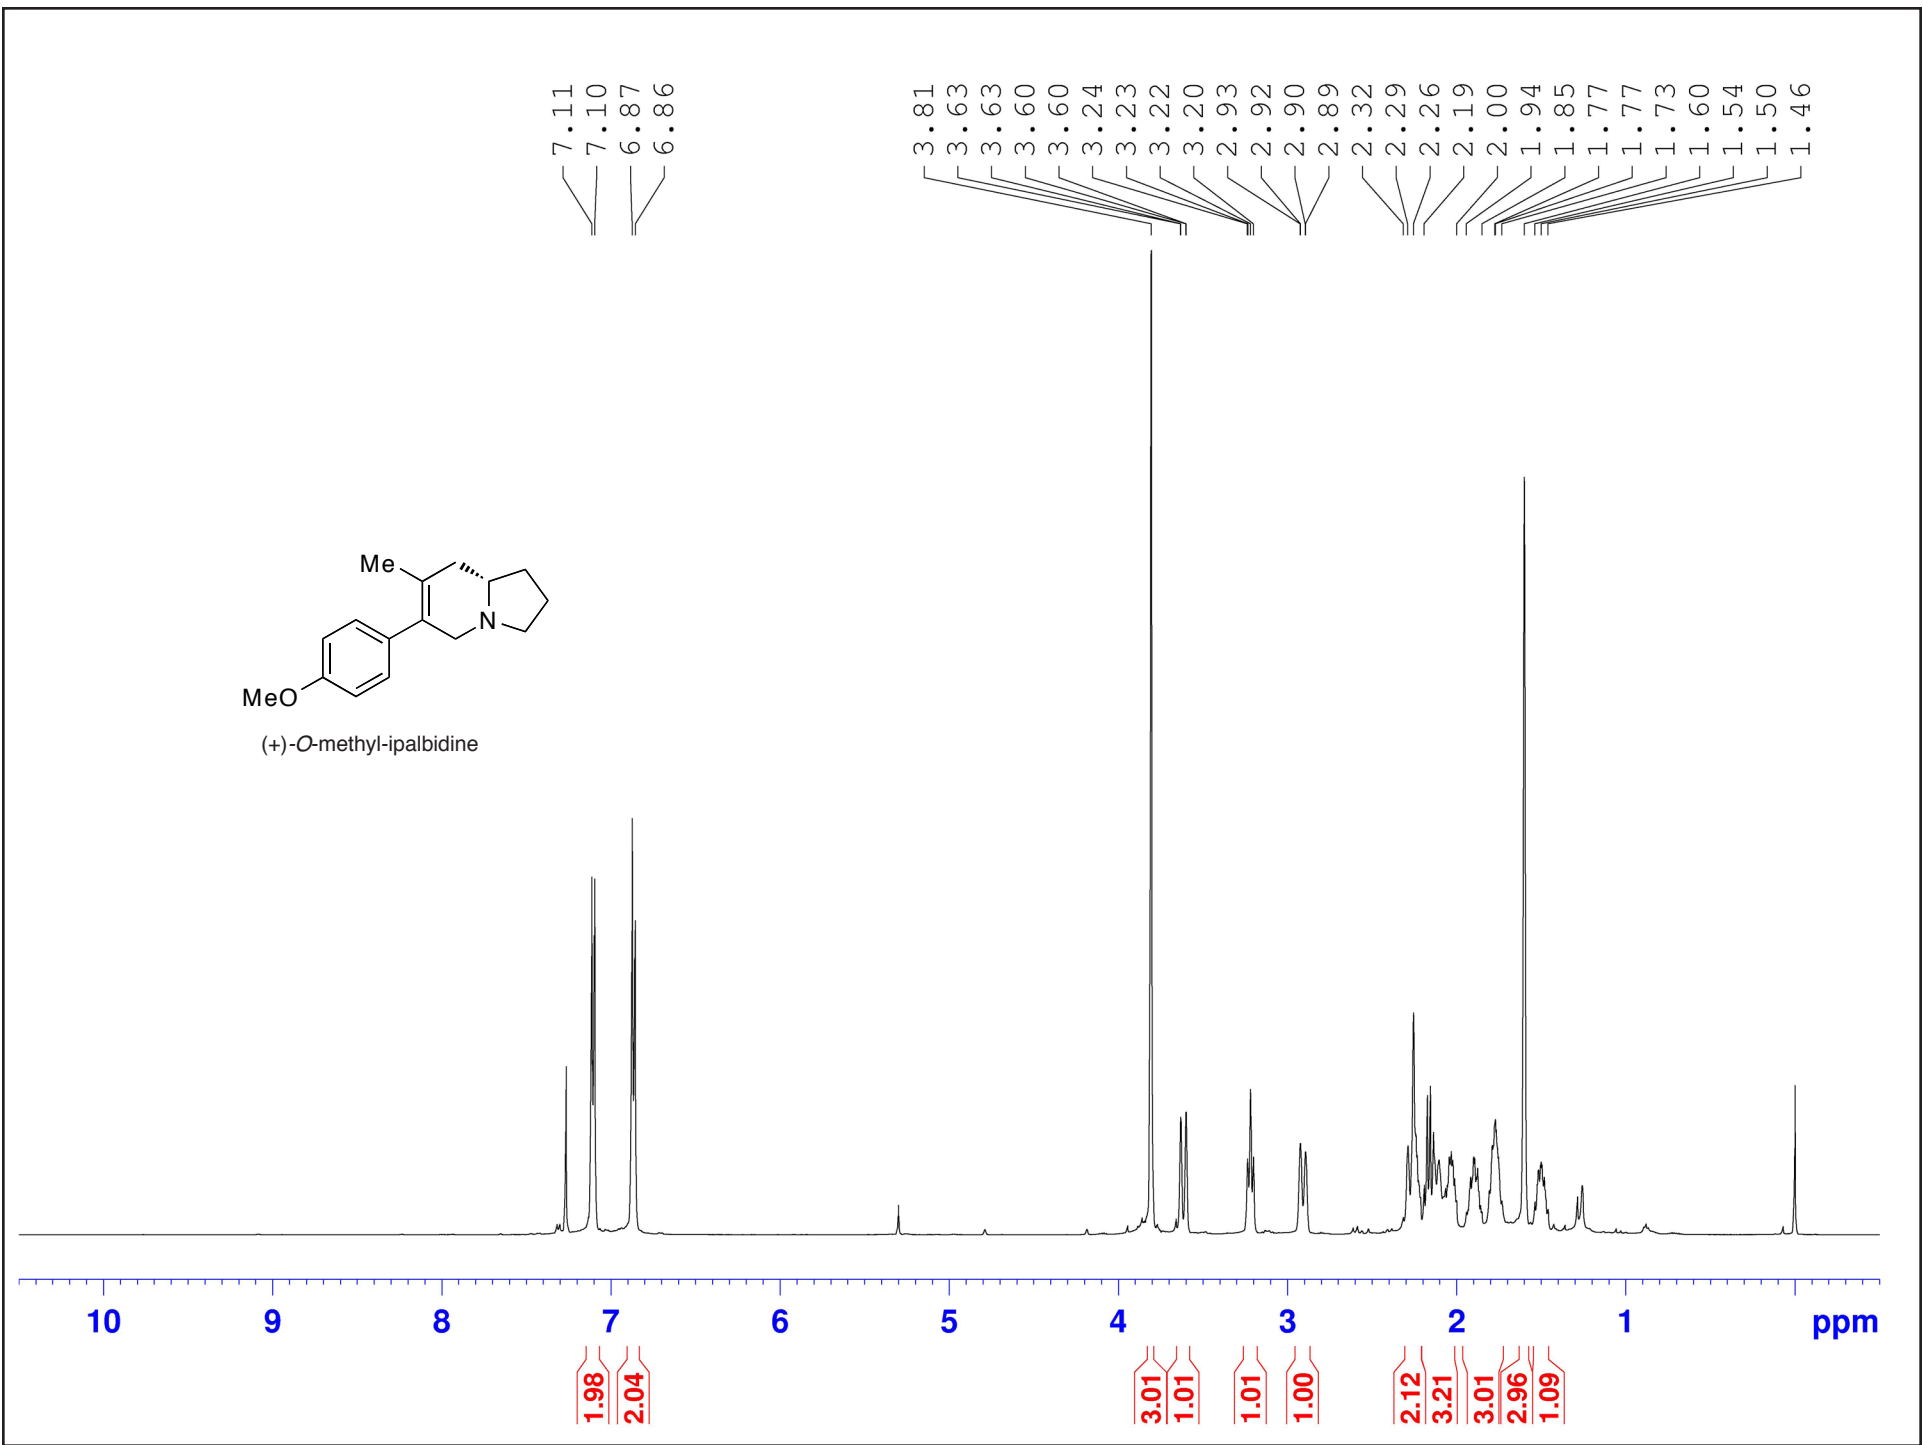

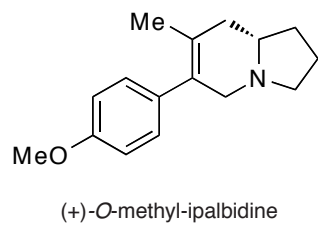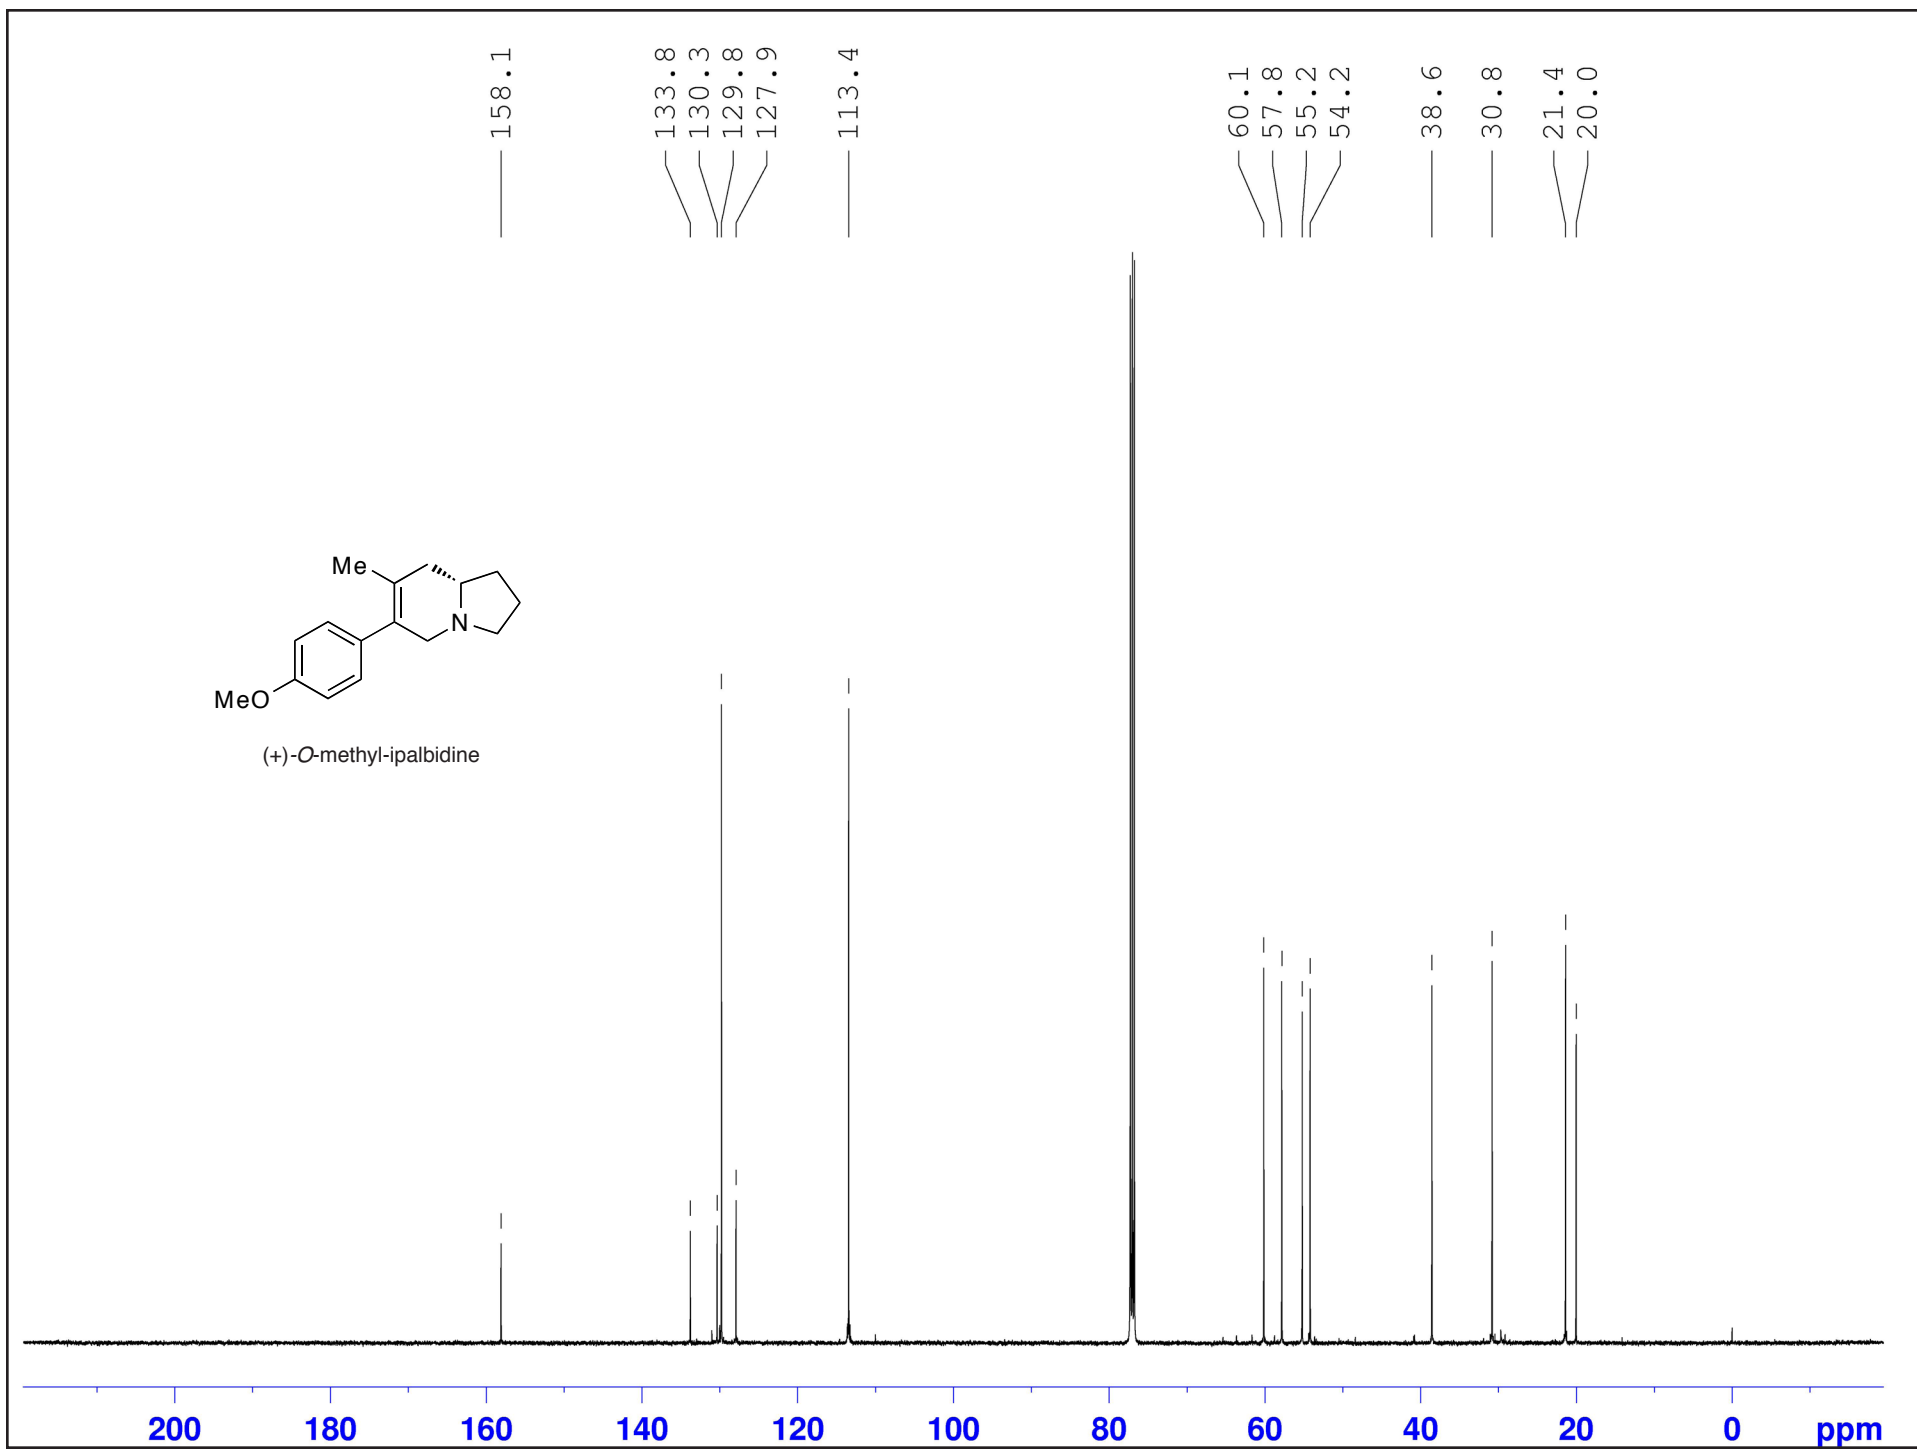

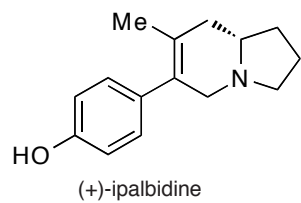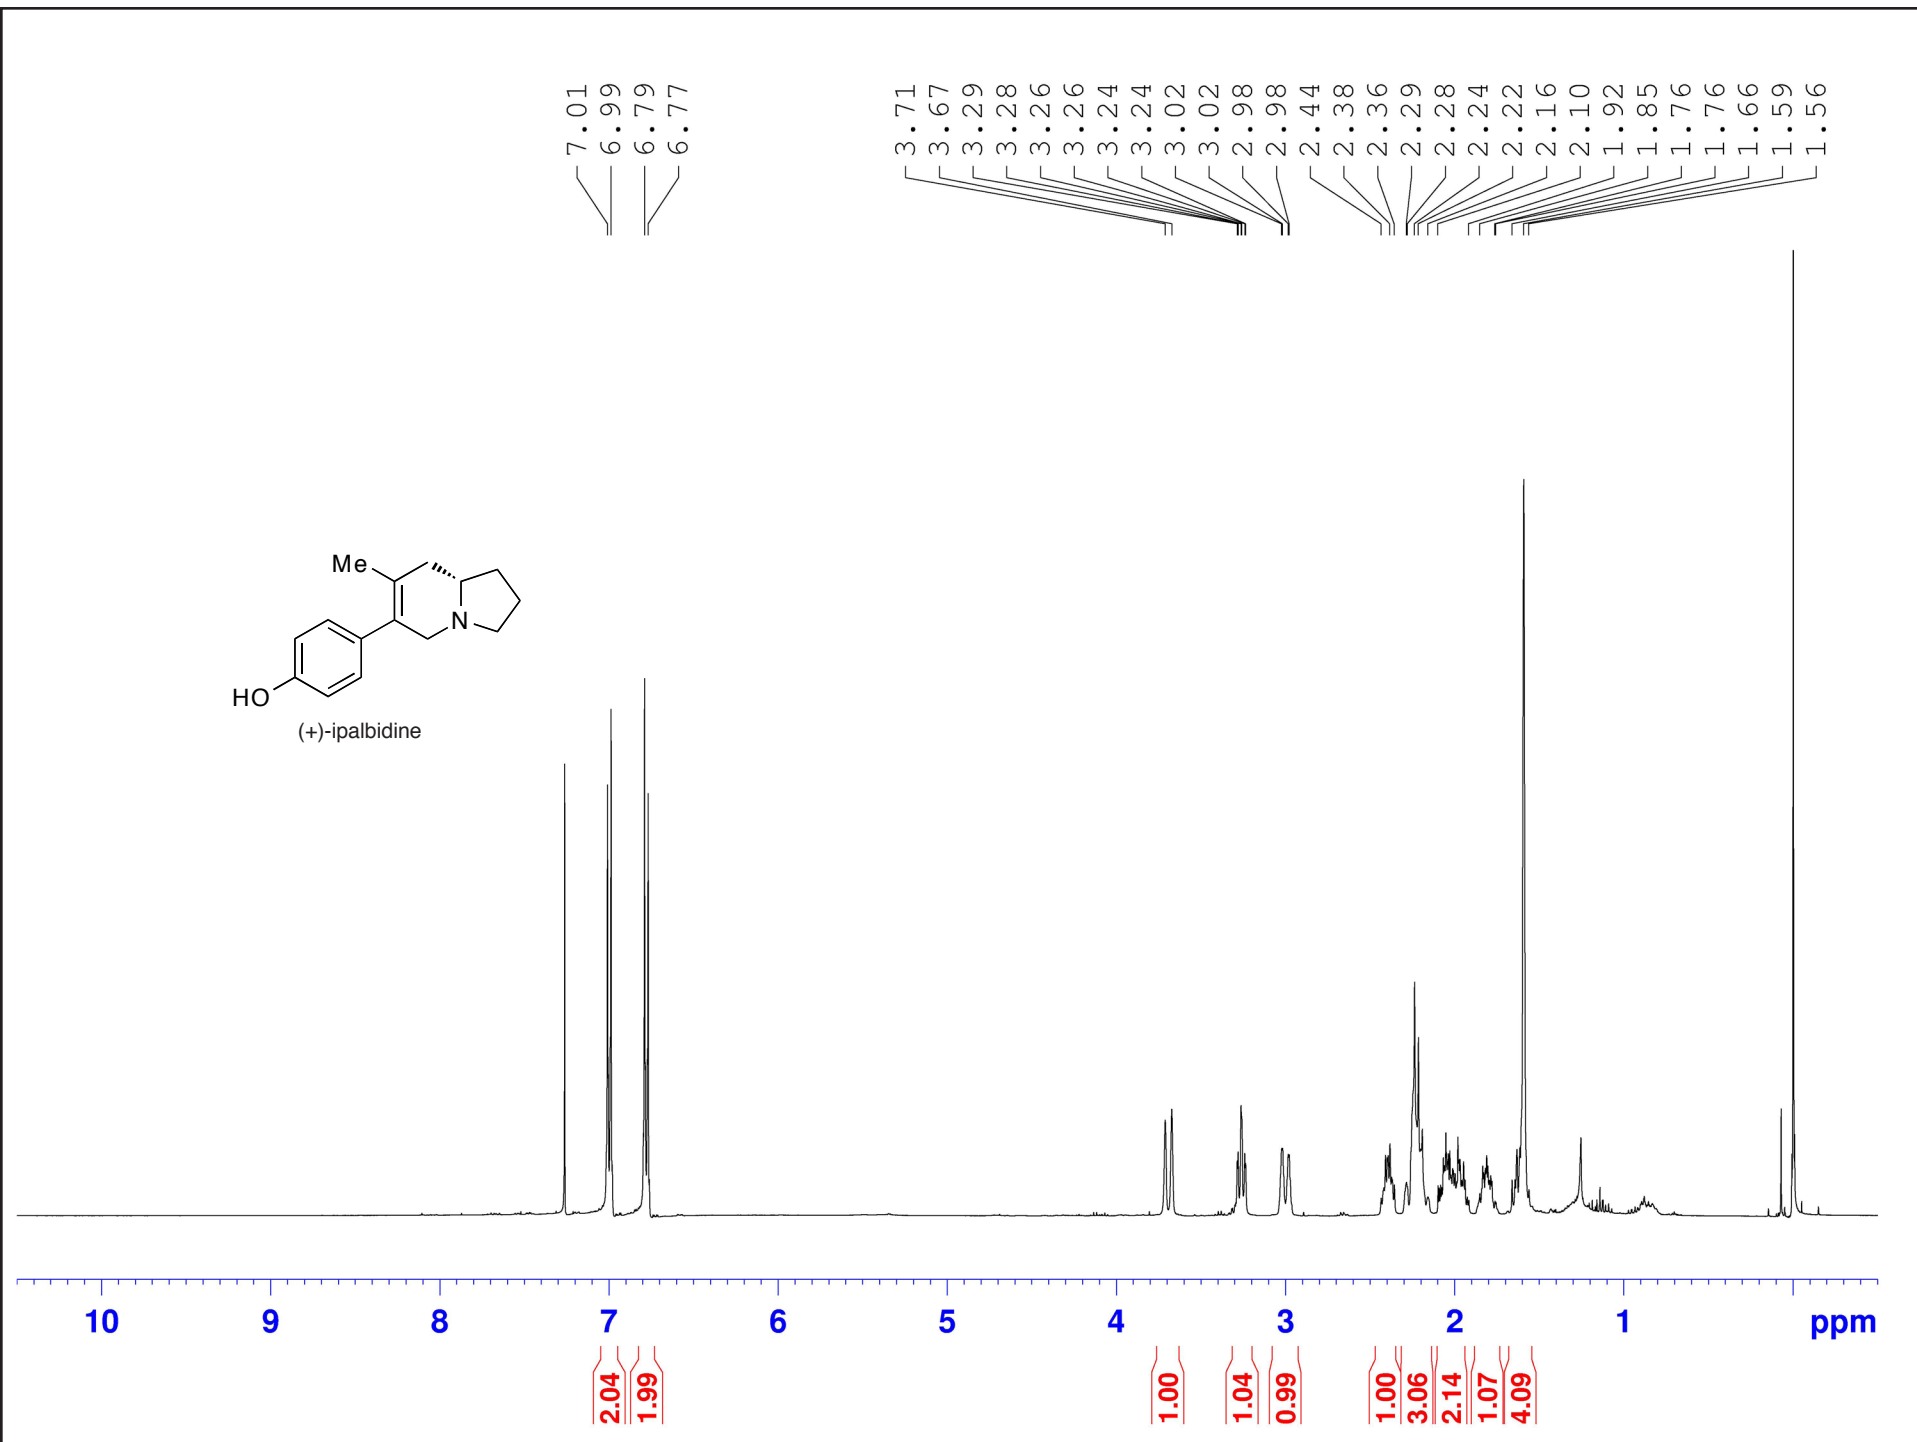

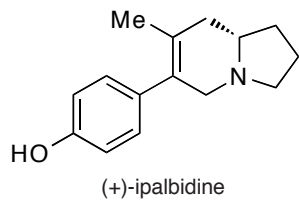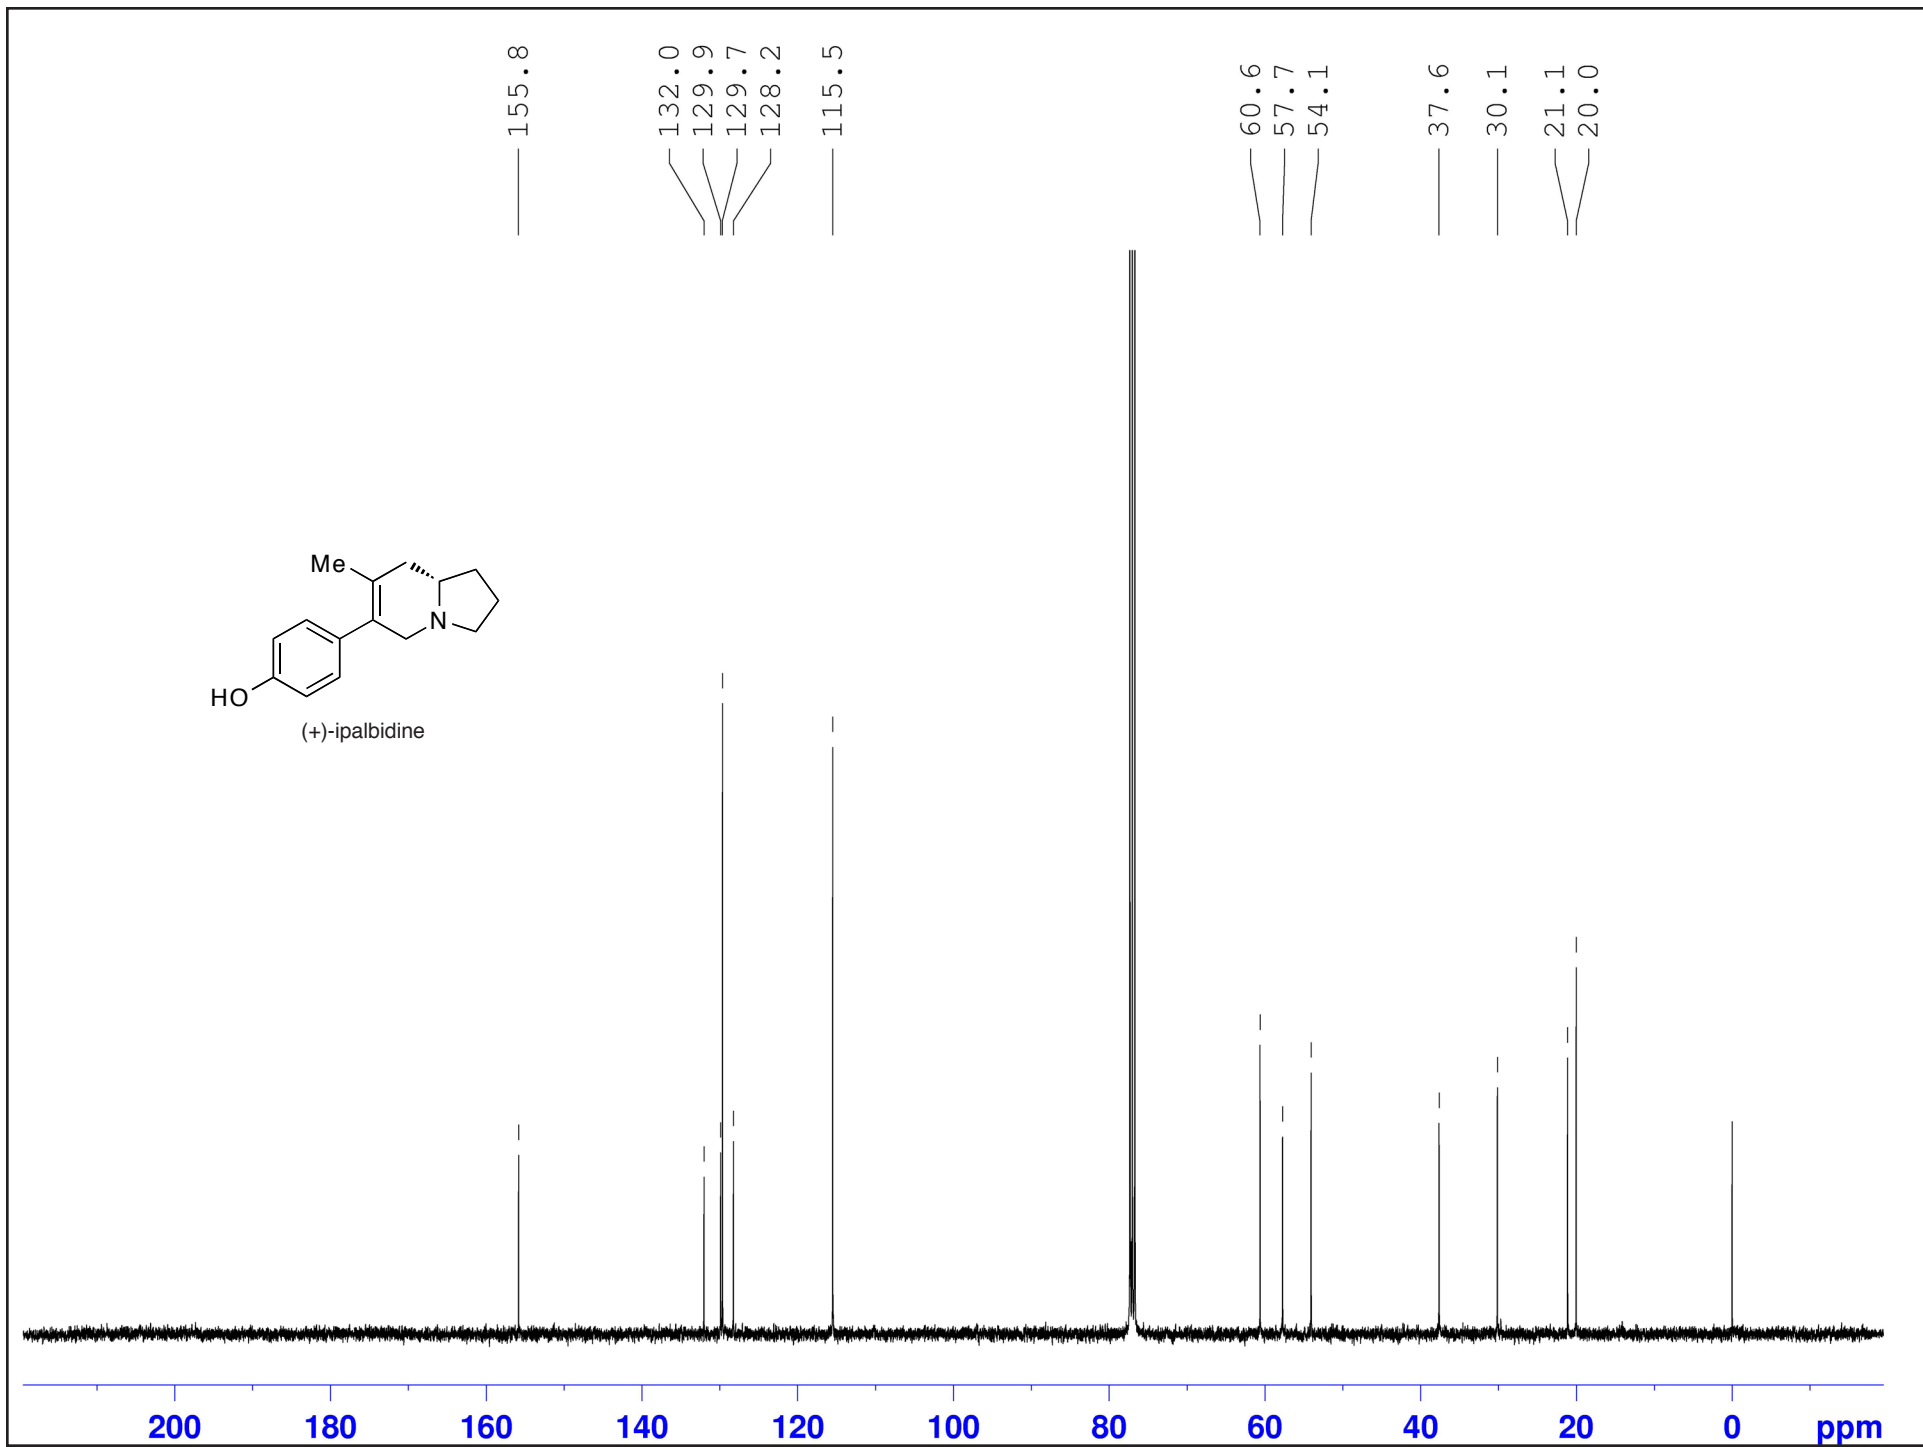

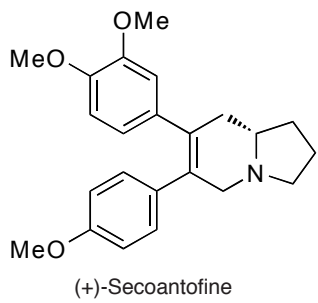

6.98  
6.96  
6.69  
6.67  
6.66  
6.47  
6.47  
3.88  
3.84  
3.81  
3.72  
3.54  
3.33  
3.32  
3.31  
3.30  
3.28  
3.28  
3.10  
3.09  
3.09  
3.05  
3.04  
2.77  
2.77  
2.75  
2.75  
2.72  
2.71  
2.70  
2.69  
2.44  
2.42  
2.40  
2.36  
2.28  
2.26  
2.23  
2.21  
2.14  
2.10  
2.06  
2.00

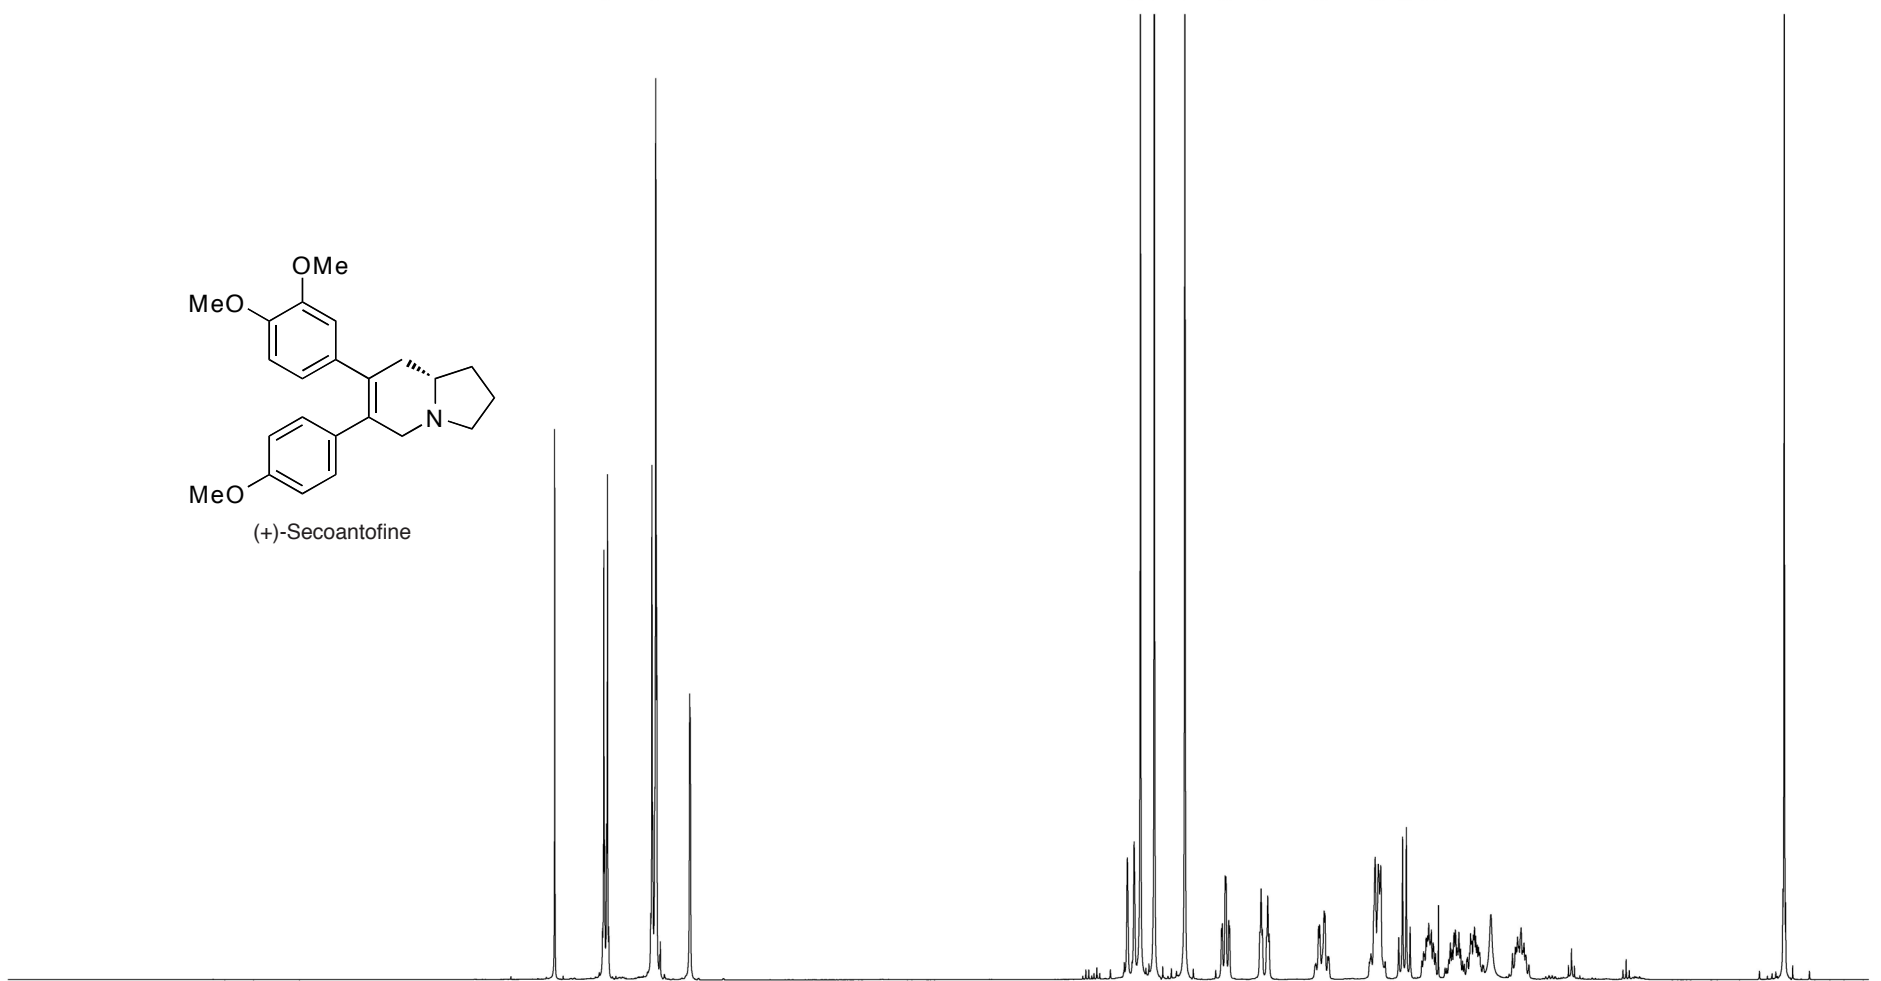

10 9 8 7 6 5 4 3 2 1 ppm

1.99  
3.96  
1.00  
1.04  
3.02  
3.02  
3.00  
0.99  
0.99  
1.00  
2.01  
1.02  
1.04  
2.09  
1.03

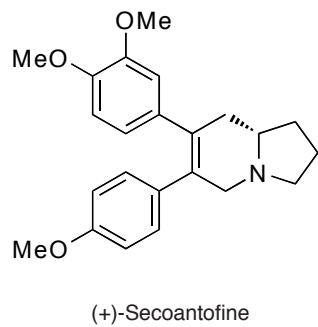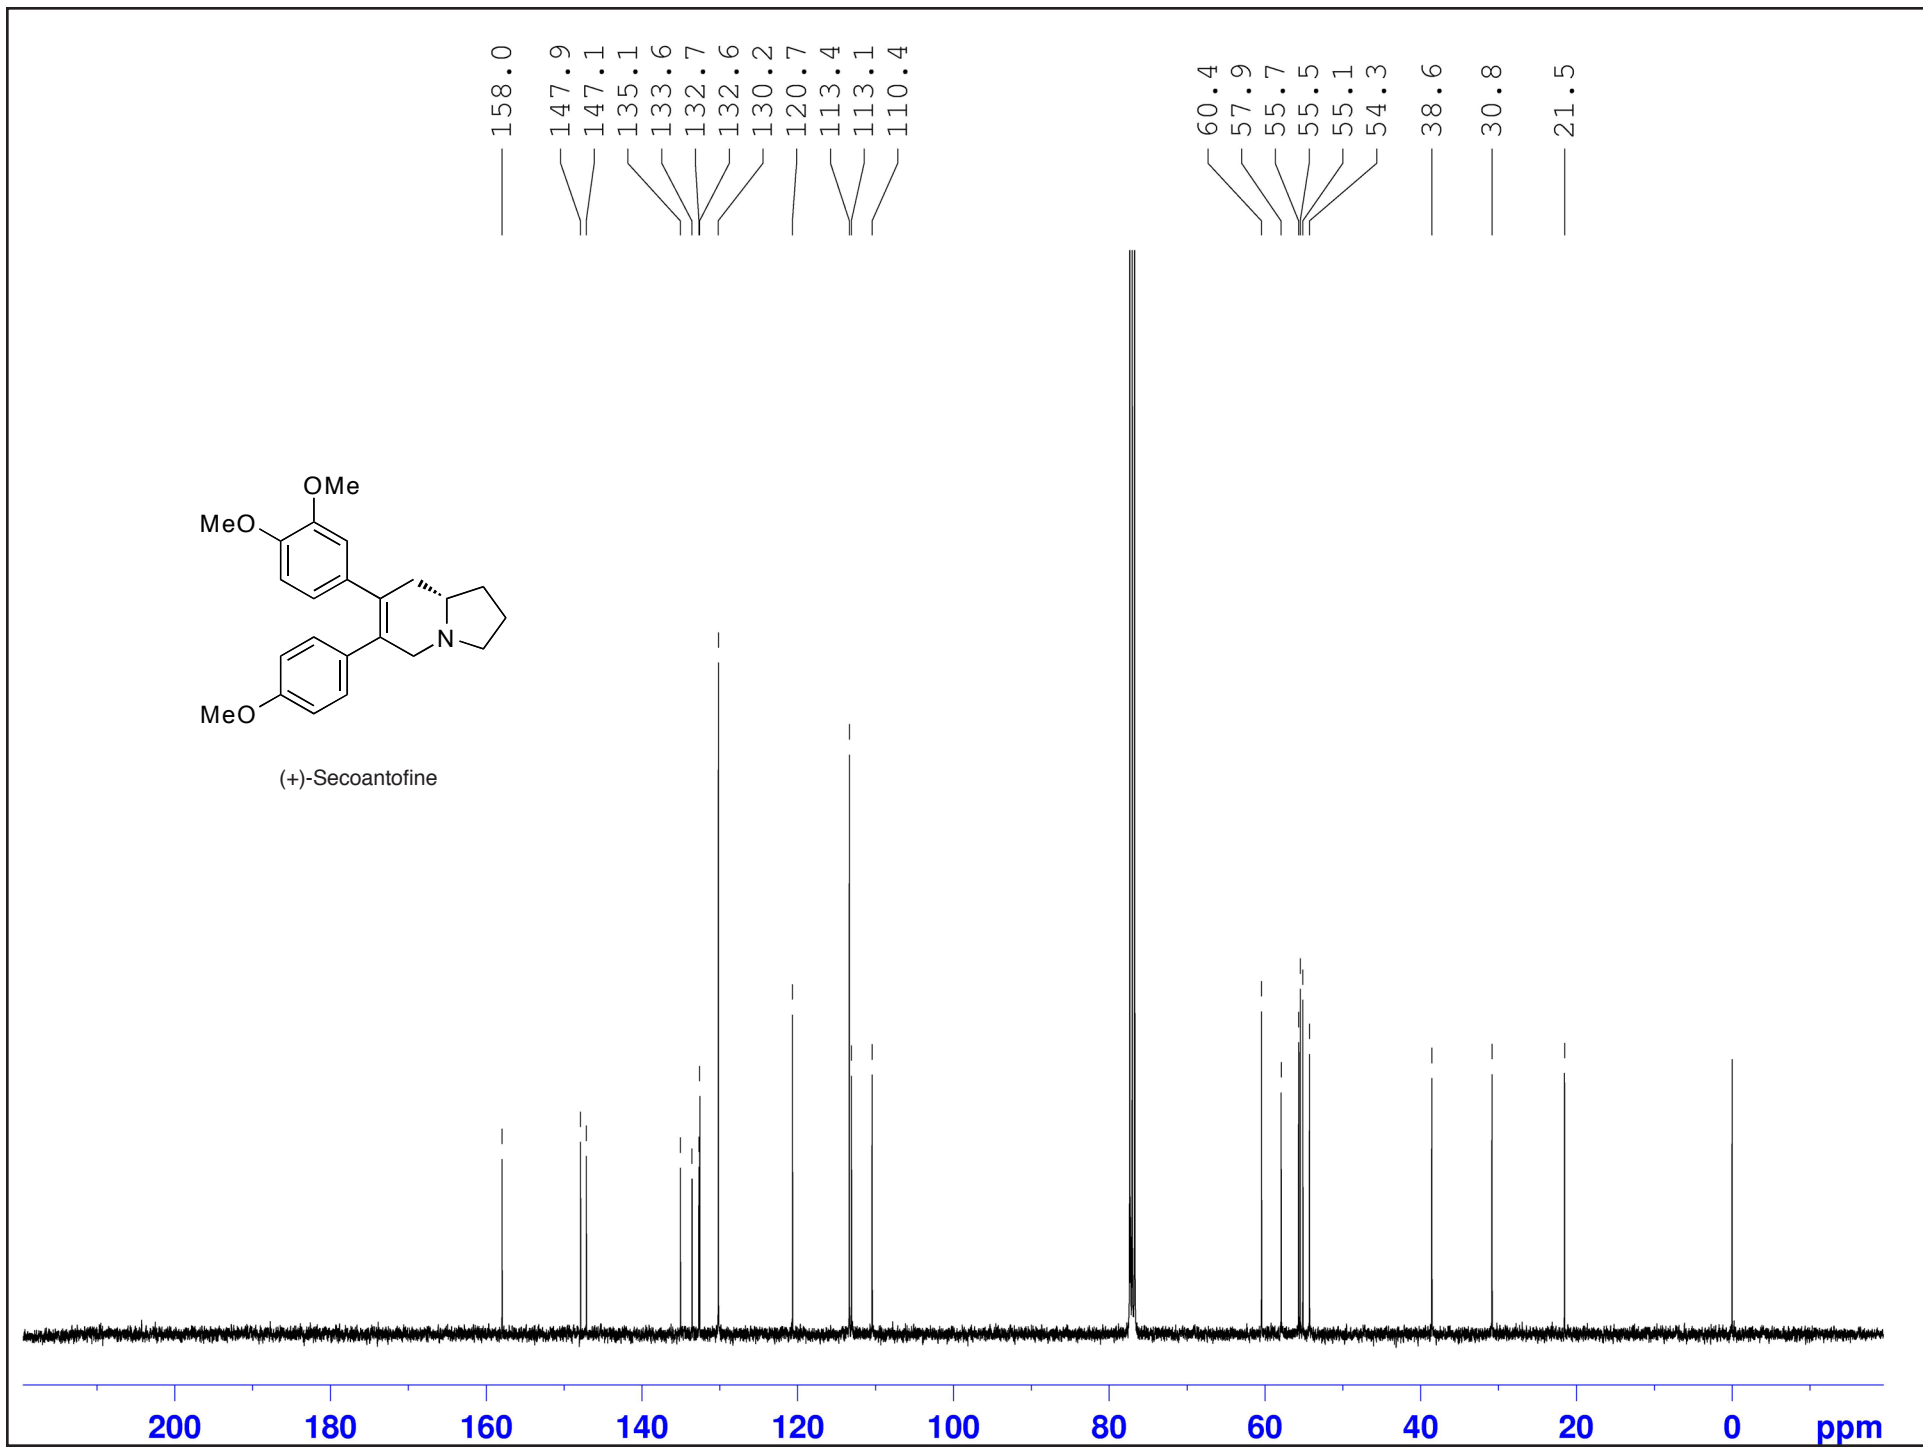



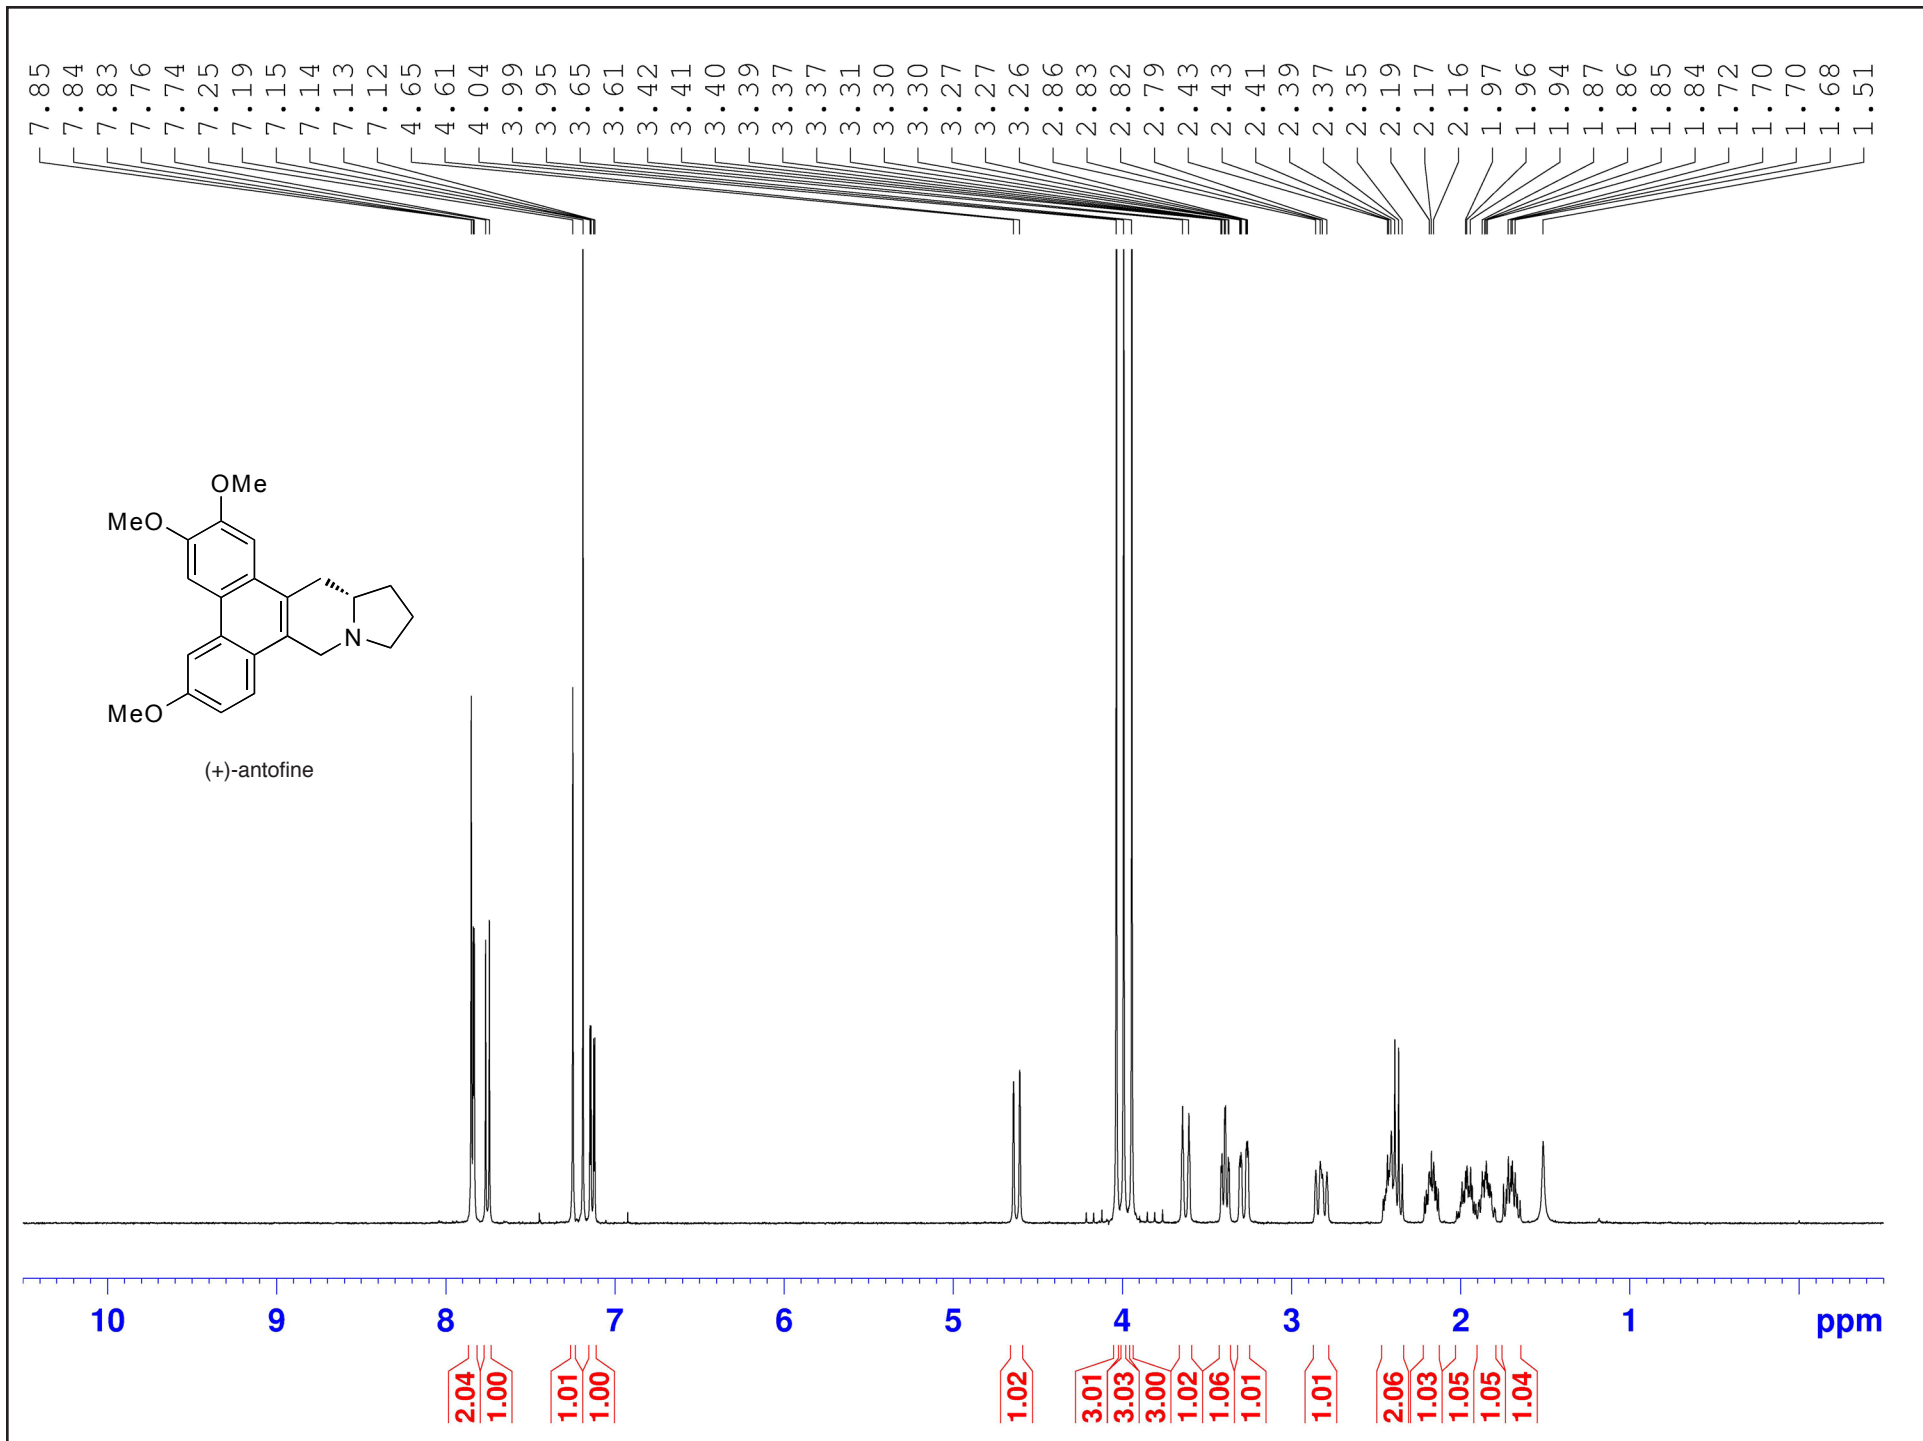

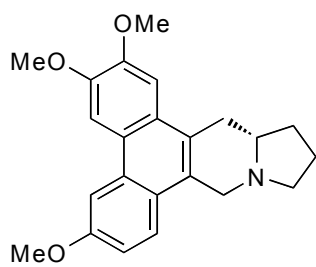

(+)-antofine

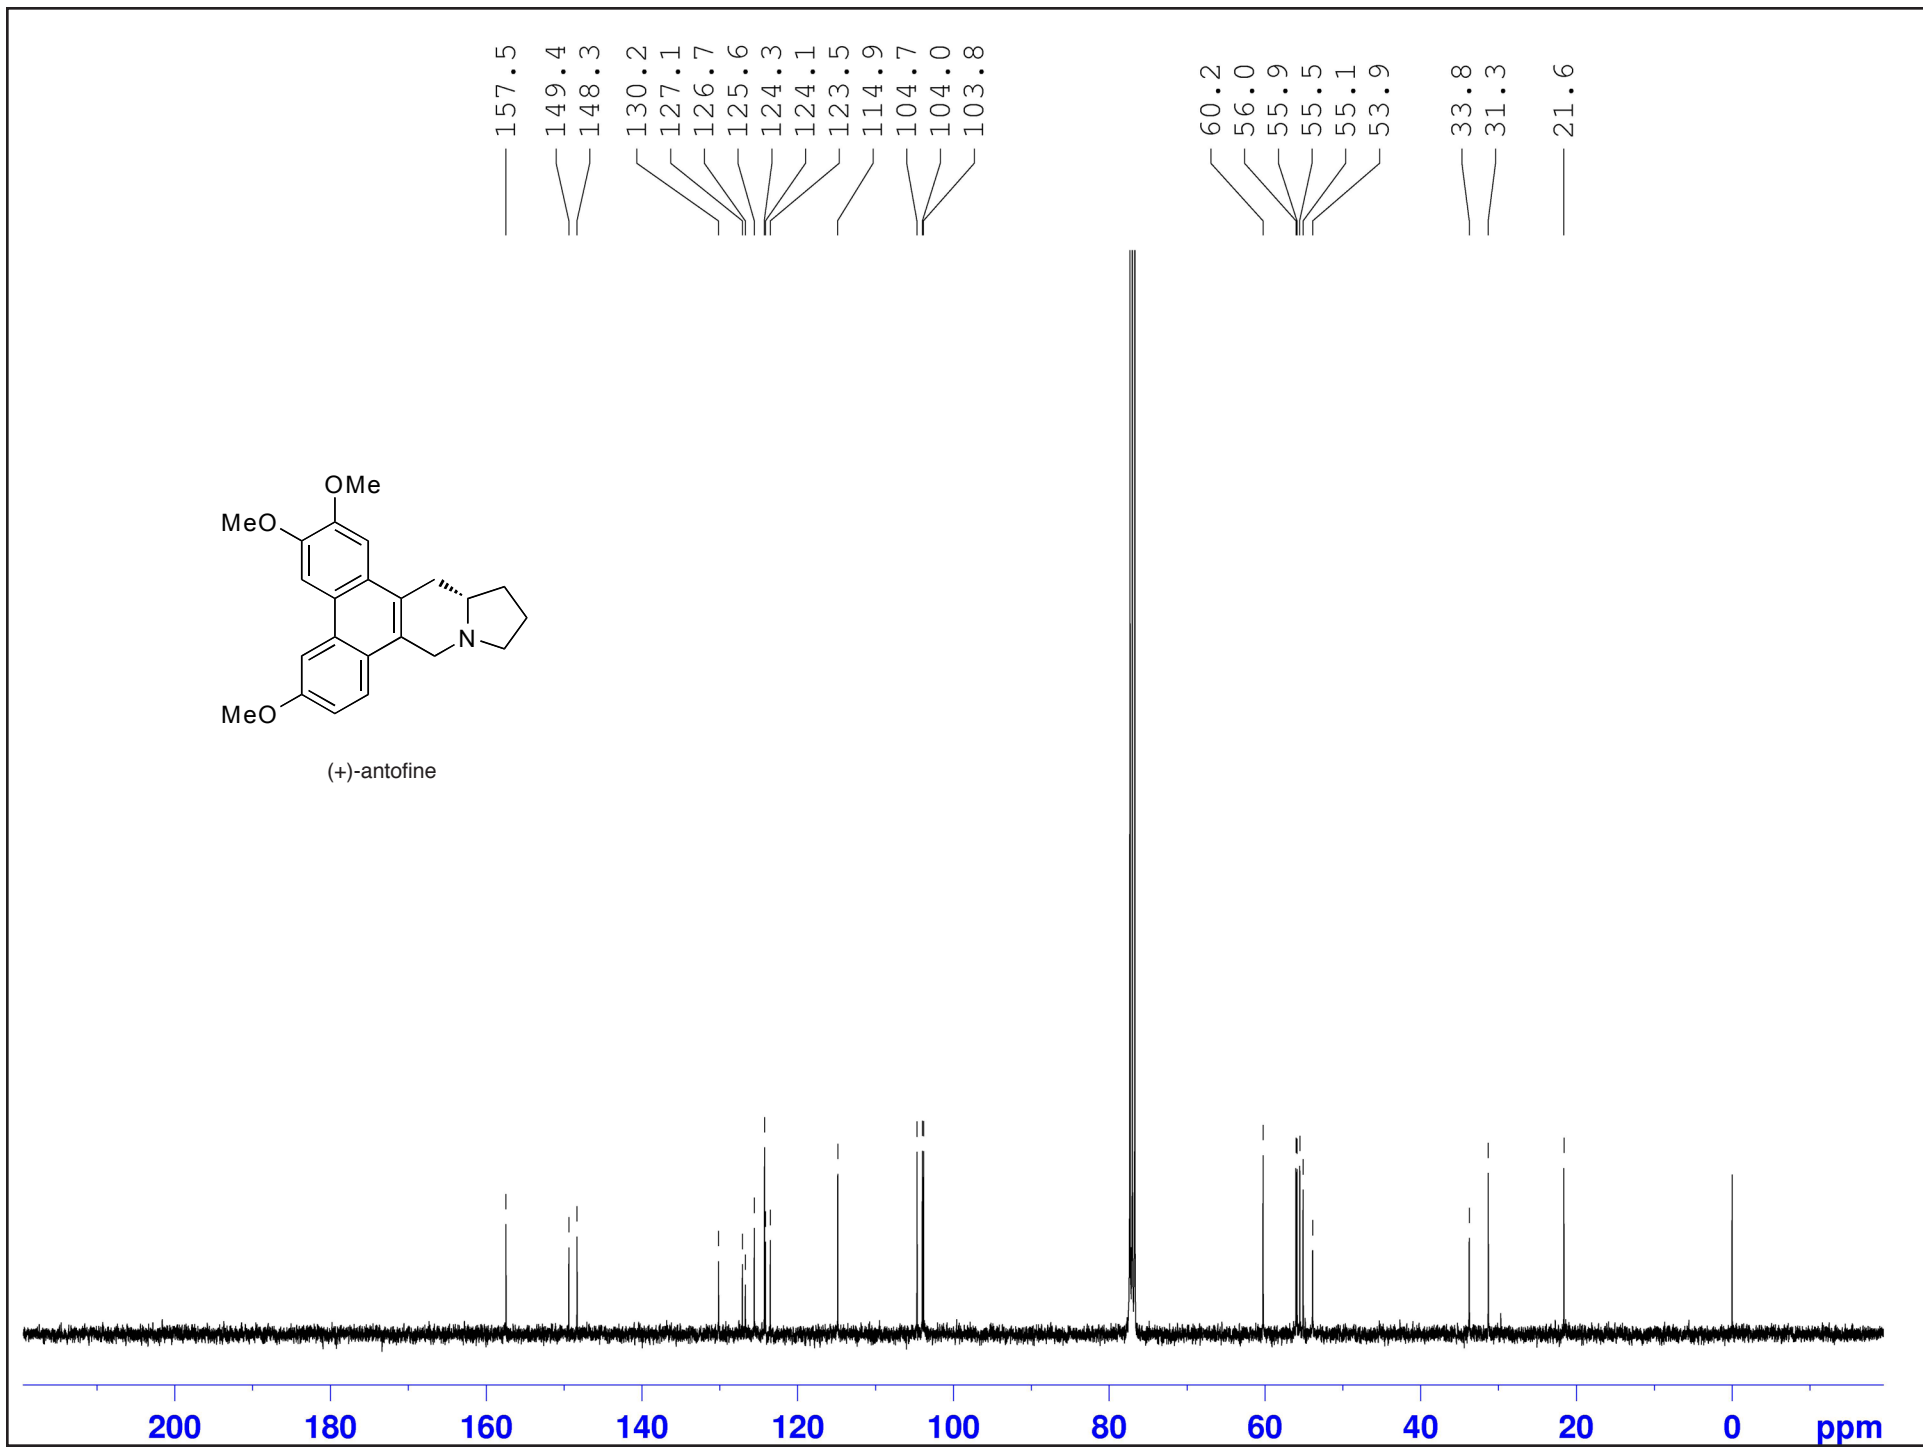

Supplement: NIHMS228619-supplement-1_si_001.pdf [file NIHMS228619-supplement-1_si_001.pdf]
